# Supplementary material for: MicroRNA exporter HuR clears the internalized pathogens by promoting pro‐inflammatory response in infected macrophages
Source: PubMed Central journal article supplement (PMC7059013; doi:10.15252/emmm.201911011), 2020-02-07
Supplement: EMMM-12-e11011-s001.pdf [file EMMM-12-e11011-s001.pdf]

Appendix of

**MicroRNA Exporter HuR Clears the Internalized Pathogens by Promoting Pro-inflammatory Response in Infected Macrophages**

**Goswami et al.**

***Table of content***

|                                                                                                     |                |
|-----------------------------------------------------------------------------------------------------|----------------|
| <b>1. Appendix Table S1</b> HuR target gene status in <i>L. donovani</i> infected (LDI) macrophages | <b>Page 2</b>  |
| <b>2. Appendix Table S2</b> List of experiments and P values                                        | <b>Page 6</b>  |
| <b>3. Appendix Table S3</b> List of Primers used for mRNA detection                                 | <b>Page 11</b> |
| <b>4. Appendix Table S4</b> List of antibodies used                                                 | <b>Page 12</b> |
| <b>5. Appendix Figure S1</b> Expression profile of HuR targets in <i>Ld</i> infected macrophages    | <b>Page 13</b> |

**Appendix Table 1: HuR target gene status in *L. donovani* infected (LDI) macrophages.**

HuR target genes found to be differentially expressed in monocyte-derived macrophages exposed to the intracellular protozoan parasite *L. donovani* for 16 hours have been tabulated here.

|                                                                                                                                                         | Gene Name | log Fold Change (LDI macrophage) | p-value (LDI macrophage) | No. of HuR sites (Lebedeva et al., 2011) | No. of HuR sites (Mukherjee et al., 2011) | HuR ( <i>Elavl1</i> ) knockout murine bone marrow-derived macrophages (Lu et al, 2014) |
|---------------------------------------------------------------------------------------------------------------------------------------------------------|-----------|----------------------------------|--------------------------|------------------------------------------|-------------------------------------------|----------------------------------------------------------------------------------------|
| HuR target genes that show down-regulation upon HuR knockdown in other cell types and are down-regulated in <i>L. donovani</i> infection in macrophages | ANGEL2    | -1.65                            | 4.80E-04                 |                                          | 9                                         | Downregulated                                                                          |
|                                                                                                                                                         | ANGPT2    | -2.24                            | 6.69E-04                 |                                          | 1                                         | Upregulated                                                                            |
|                                                                                                                                                         | CD47      | -1.58                            | 1.63E-02                 |                                          | 7                                         | Upregulated                                                                            |
|                                                                                                                                                         | CDC42BP A | -1.56                            | 1.14E-03                 | 14                                       |                                           | Downregulated                                                                          |
|                                                                                                                                                         | CELF1     | -3.89                            | 2.98E-04                 | 15                                       |                                           | Upregulated                                                                            |
|                                                                                                                                                         | CYB5A     | -2.02                            | 7.43E-03                 | 2                                        |                                           | Downregulated                                                                          |
|                                                                                                                                                         | DIAPH2    | -1.77                            | 9.52E-04                 | 9                                        |                                           | Downregulated                                                                          |
|                                                                                                                                                         | ELK4      | -2.2                             | 6.88E-04                 |                                          | 25                                        | Upregulated                                                                            |
|                                                                                                                                                         | FASTKD2   | -2.21                            | 6.85E-04                 | 2                                        |                                           | Downregulated                                                                          |
|                                                                                                                                                         | FBXL4     | -2.61                            | 5.35E-04                 |                                          | 10                                        | Upregulated                                                                            |
|                                                                                                                                                         | GOLGB1    | -2.41                            | 3.52E-02                 | 2                                        |                                           | Not found                                                                              |
|                                                                                                                                                         | KIF3A     | -3.11                            | 4.14E-04                 |                                          | 23                                        | Upregulated                                                                            |
|                                                                                                                                                         | MSX2      | -4.43                            | 2.45E-04                 |                                          | 3                                         | Upregulated                                                                            |
|                                                                                                                                                         | NF1P9     | -1.62                            | 1.08E-03                 | 13                                       |                                           | Not found                                                                              |
| Sep-11                                                                                                                                                  | -3.11     | 1.63E-04                         | 14                       |                                          | Not found                                 |                                                                                        |
| TCEB3                                                                                                                                                   | -4.48     | 2.42E-04                         | 7                        |                                          | Not found                                 |                                                                                        |
| HuR target genes that show up-regulation upon HuR knockdown in other cell types and are up-regulated in <i>L. donovani</i> infection in macrophages     | ARID5B    | 1.69                             | 4.74E-03                 |                                          | 12                                        | Upregulated                                                                            |
|                                                                                                                                                         | ATP13A3   | 1.51                             | 5.19E-05                 |                                          | 30                                        | Downregulated                                                                          |
|                                                                                                                                                         | BCL10     | 2.32                             | 1.21E-03                 | 10                                       |                                           | Not found                                                                              |
|                                                                                                                                                         | CD44      | 1.73                             | 9.78E-04                 | 9                                        | 4                                         | Downregulated                                                                          |
|                                                                                                                                                         | CDH2      | 4.25                             | 2.60E-04                 |                                          | 1                                         | Upregulated                                                                            |
|                                                                                                                                                         | CLIP1     | 1.79                             | 3.32E-04                 | 6                                        |                                           | Upregulated                                                                            |
|                                                                                                                                                         | CRKL      | 3.04                             | 8.47E-03                 |                                          | 4                                         | Not found                                                                              |
|                                                                                                                                                         | DUSP3     | 2.1                              | 3.51E-05                 | 3                                        |                                           | Downregulated                                                                          |
|                                                                                                                                                         | DYRK1A    | 7.33                             | 1.17E-04                 |                                          | 61                                        | Downregulated                                                                          |
|                                                                                                                                                         | ECE1      | 1.75                             | 1.55E-02                 | 2                                        |                                           | Upregulated                                                                            |
|                                                                                                                                                         | EIF4E     | 2.06                             | 9.79E-04                 |                                          | 23                                        | Not found                                                                              |
|                                                                                                                                                         | FAM110B   | 2.12                             | 2.18E-02                 |                                          | 2                                         | Upregulated                                                                            |
|                                                                                                                                                         | FUT8      | 1.58                             | 1.12E-03                 |                                          | 16                                        | Downregulated                                                                          |
|                                                                                                                                                         | GBP1      | 1.76                             | 1.18E-03                 | 2                                        |                                           | Not found                                                                              |
|                                                                                                                                                         | GCH1      | 3.44                             | 1.40E-03                 |                                          | 6                                         | Upregulated                                                                            |
| HIPK3                                                                                                                                                   | 1.81      | 1.92E-02                         |                          | 9                                        | Upregulated                               |                                                                                        |
| ITGAV                                                                                                                                                   | 3.32      | 8.99E-04                         | 20                       |                                          | Downregulated                             |                                                                                        |
| LMAN1                                                                                                                                                   | 2.29      | 4.85E-03                         | 10                       |                                          | Upregulated                               |                                                                                        |

|                                                                           |         |       |          |    |    |               |
|---------------------------------------------------------------------------|---------|-------|----------|----|----|---------------|
|                                                                           | MED21   | 2.74  | 4.98E-04 |    |    | Not found     |
|                                                                           | LPP     | 2.11  | 3.09E-02 | 42 | 46 | Downregulated |
|                                                                           | MAP7    | 2.07  | 9.05E-03 | 13 |    | Upregulated   |
|                                                                           | MAST1   | 2.82  | 4.76E-04 |    | 2  | Downregulated |
|                                                                           | MDM2    | 3.23  | 4.51E-03 |    | 4  | Downregulated |
|                                                                           | ME1     | 3.52  | 1.48E-02 | 8  |    | Downregulated |
|                                                                           | MINPP1  | 2.13  | 4.29E-03 | 3  |    | Upregulated   |
|                                                                           | MOCS3   | 1.53  | 1.17E-03 | 4  |    | Downregulated |
|                                                                           | MPZL1   | 2.74  | 1.03E-04 | 6  |    | Downregulated |
|                                                                           | PAR6B   | 2.7   | 1.20E-04 |    | 3  | Not found     |
|                                                                           | PITPNB  | 2.42  | 1.15E-02 | 12 | 43 | Downregulated |
|                                                                           | PMAIP1  | 2.41  | 5.99E-06 |    | 15 | Downregulated |
|                                                                           | PPID    | 6.36  | 1.44E-04 | 3  |    | Downregulated |
|                                                                           | PPP3R1  | 3.06  | 5.16E-03 | 11 |    | Downregulated |
|                                                                           | PRKAR1A | 1.92  | 4.58E-02 |    | 18 | Not found     |
|                                                                           | PTPN1   | 1.53  | 1.17E-04 | 3  |    | Downregulated |
|                                                                           | RAB31   | 1.8   | 5.24E-03 | 10 |    | Upregulated   |
|                                                                           | RAB5B   | 2.79  | 4.85E-04 |    | 5  | Downregulated |
|                                                                           | RALA    | 1.59  | 1.89E-04 | 8  |    | Downregulated |
|                                                                           | RARA    | 1.76  | 2.16E-03 |    | 2  | Upregulated   |
|                                                                           | RBBP4   | 1.95  | 1.52E-02 |    | 13 | Not found     |
|                                                                           | RCN2    | 5.07  | 1.65E-03 | 2  |    | Downregulated |
|                                                                           | SACS    | 3.99  | 4.66E-04 | 5  |    | Downregulated |
|                                                                           | SDC2    | 1.78  | 3.20E-02 | 10 |    | Upregulated   |
|                                                                           | SMARCD1 | 2.25  | 5.58E-03 | 3  |    | Upregulated   |
|                                                                           | SNAP23  | 2.14  | 3.89E-03 |    | 1  | Not found     |
|                                                                           | MATR3   | 5.6   | 2.42E-04 |    |    | Not found     |
|                                                                           | SSFA2   | 2.28  | 2.07E-02 | 25 |    | Downregulated |
|                                                                           | TBC1D5  | 8.24  | 2.37E-05 | 4  |    | Downregulated |
|                                                                           | TCF7L2  | 1.76  | 9.56E-04 |    | 20 | Upregulated   |
|                                                                           | TM4SF1  | 1.99  | 1.46E-03 | 5  |    | Upregulated   |
|                                                                           | TMED7   | 1.62  | 7.44E-03 | 23 |    | Not found     |
|                                                                           | TMX1    | 1.97  | 1.83E-03 | 9  |    | Not found     |
|                                                                           | TP53    | 1.76  | 3.09E-02 |    | 4  | Downregulated |
|                                                                           | UAP1    | 2.21  | 6.86E-04 | 3  |    | Upregulated   |
|                                                                           | UBE2K   | 2.36  | 2.97E-02 | 24 |    | Downregulated |
|                                                                           | XIAP    | 2.27  | 6.58E-04 |    | 24 | Downregulated |
|                                                                           | YWHAZ   | 3.18  | 3.62E-03 | 10 |    | Downregulated |
| HuR target genes that show up-regulation upon HuR knockdown in other cell | ETV5    | -1.65 | 3.21E-05 |    | 5  | Downregulated |
|                                                                           | SNCA    | -4.43 | 2.45E-04 |    | 17 | Downregulated |
|                                                                           | MPPED2  | -3.45 | 3.54E-04 |    | 1  | Upregulated   |
|                                                                           | COL1A1  | -2.57 | 5.47E-04 | 1  |    | Upregulated   |
|                                                                           | PAR6B   | -2.28 | 6.53E-04 |    | 3  | Not found     |
|                                                                           | FGF5    | -1.88 | 8.67E-04 |    | 4  | Downregulated |
|                                                                           | PRKAA1  | -1.78 | 9.37E-04 | 25 |    | Downregulated |

|                                                                                                                                                       |         |          |          |    |               |               |
|-------------------------------------------------------------------------------------------------------------------------------------------------------|---------|----------|----------|----|---------------|---------------|
| types but are down-regulated in <i>L. donovani</i> infection in macrophages                                                                           | ECD     | -1.65    | 1.05E-03 | 4  |               | Downregulated |
|                                                                                                                                                       | SS18    | -1.83    | 9.44E-04 |    | 58            | Downregulated |
|                                                                                                                                                       | MKL1    | -2       | 4.01E-03 | 4  |               | Upregulated   |
|                                                                                                                                                       | FSCN1   | -2.02    | 8.38E-03 | 4  |               | Upregulated   |
|                                                                                                                                                       | TRAPPC2 | -1.71    | 1.82E-02 |    |               | Not found     |
|                                                                                                                                                       | ACVR2A  | -1.72    | 3.86E-02 |    | 10            | Upregulated   |
| HuR target genes that show down-regulation upon HuR knockdown in other cell types but are up-regulated in <i>L. donovani</i> infection in macrophages | AMD1    | 1.81     | 1.93E-03 |    | 17            | Downregulated |
|                                                                                                                                                       | ANKRD17 | 2.08     | 1.83E-02 | 27 |               | Downregulated |
|                                                                                                                                                       | ANP32E  | 1.8      | 9.01E-03 | 16 |               | Downregulated |
|                                                                                                                                                       | ATF2    | 1.52     | 1.21E-04 |    | 41            | Downregulated |
|                                                                                                                                                       | BAZ1A   | 2.07     | 3.07E-05 | 4  |               | Not found     |
|                                                                                                                                                       | BCL10   | 2.32     | 1.21E-03 |    | 15            | Not found     |
|                                                                                                                                                       | CASP2   | 1.74     | 5.39E-03 |    | 8             | Upregulated   |
|                                                                                                                                                       | CEP170  | 2.05     | 3.80E-05 |    |               | Not found     |
|                                                                                                                                                       | CKS2    | 5.32     | 2.70E-02 | 3  |               | Upregulated   |
|                                                                                                                                                       | CLPX    | 2.08     | 3.45E-03 | 2  |               | Upregulated   |
|                                                                                                                                                       | CRKL    | 3.04     | 8.47E-03 | 6  |               | Not found     |
|                                                                                                                                                       | DDX10   | 3.03     | 1.95E-06 | 5  |               | Downregulated |
|                                                                                                                                                       | DDX21   | 1.81     | 4.92E-03 | 11 |               | Downregulated |
|                                                                                                                                                       | EIF4E   | 2.06     | 9.79E-04 | 9  |               | Not found     |
|                                                                                                                                                       | ETS2    | 2.25     | 3.19E-03 |    | 2             | Downregulated |
|                                                                                                                                                       | ETV3    | 1.6      | 1.10E-03 |    | 9             | Downregulated |
|                                                                                                                                                       | EXPH5   | 2.67     | 7.36E-04 |    | 8             | Downregulated |
|                                                                                                                                                       | FECH    | 2.03     | 7.32E-03 | 6  |               | Not found     |
|                                                                                                                                                       | FGFR1OP | 2.15     | 1.00E-04 | 2  |               | Downregulated |
|                                                                                                                                                       | FKBP5   | 1.66     | 1.04E-03 | 3  | 7             | Downregulated |
|                                                                                                                                                       | FXN     | 2.78     | 4.86E-04 |    | 1             | Downregulated |
|                                                                                                                                                       | GEM     | 1.97     | 2.35E-03 |    | 2             | Downregulated |
|                                                                                                                                                       | GNS     | 1.54     | 2.52E-02 | 2  |               | Upregulated   |
|                                                                                                                                                       | H1FO    | 1.74     | 5.63E-05 | 4  |               | Downregulated |
|                                                                                                                                                       | HOXD13  | 6        | 6.33E-06 |    | 1             | Downregulated |
|                                                                                                                                                       | IPO5    | 1.62     | 2.23E-02 | 7  |               | Downregulated |
|                                                                                                                                                       | IRF8    | 3.44     | 4.69E-03 |    | 3             | Upregulated   |
|                                                                                                                                                       | ISCA1   | 1.51     | 6.58E-03 | 2  | 7             | Downregulated |
|                                                                                                                                                       | ITPR3   | 2.77     | 4.90E-04 | 1  |               | Upregulated   |
|                                                                                                                                                       | KLHL20  | 1.53     | 1.29E-05 |    | 15            | Upregulated   |
|                                                                                                                                                       | KYNU    | 1.59     | 4.86E-04 | 13 |               | Upregulated   |
|                                                                                                                                                       | LIFR    | 1.81     | 9.17E-04 |    | 3             | Upregulated   |
|                                                                                                                                                       | SOD2    | 4.49     | 1.48E-03 | 10 |               | Not found     |
|                                                                                                                                                       | RRN3    | 5.12     | 1.98E-04 | 5  |               | Not found     |
| MAN1A1                                                                                                                                                | 2.03    | 6.67E-03 |          | 14 | Upregulated   |               |
| MAN1A2                                                                                                                                                | 5.34    | 1.86E-04 | 9        |    | Downregulated |               |
| MAX                                                                                                                                                   | 1.57    | 5.31E-03 | 6        | 5  | Upregulated   |               |
| MBNL2                                                                                                                                                 | 2.16    | 1.07E-02 |          | 1  | Downregulated |               |

|  |         |      |          |    |    |               |
|--|---------|------|----------|----|----|---------------|
|  | MET     | 2.58 | 3.26E-03 | 5  |    | Downregulated |
|  | MYO1B   | 2.16 | 7.64E-04 | 2  |    | Downregulated |
|  | N4BP2L2 | 2.57 | 5.48E-04 |    | 94 | Downregulated |
|  | NUDT21  | 1.54 | 1.79E-05 | 12 |    | Upregulated   |
|  | NUP153  | 1.8  | 2.62E-04 | 5  |    | Not found     |
|  | OXCT1   | 2.13 | 7.20E-04 | 10 |    | Downregulated |
|  | PFN2    | 3.69 | 4.27E-02 | 6  | 6  | Upregulated   |
|  | PLOD2   | 2.5  | 1.58E-03 | 16 | 4  | Upregulated   |
|  | POLR2D  | 5.63 | 1.66E-06 |    | 1  | Upregulated   |
|  | PPFIA1  | 4.77 | 2.38E-04 | 2  |    | Not found     |
|  | PPP2CA  | 3.18 | 3.99E-04 | 8  |    | Downregulated |
|  | PRKAR1A | 1.92 | 4.58E-02 | 11 |    | Not found     |
|  | PSIP1   | 1.5  | 4.25E-04 | 8  |    | Downregulated |
|  | PTPN12  | 1.67 | 2.56E-04 | 4  |    | Downregulated |
|  | RBBP4   | 1.95 | 1.52E-02 | 6  |    | Not found     |
|  | RBMS3   | 2.04 | 7.71E-04 |    | 3  | Downregulated |
|  | RDX     | 2.28 | 4.21E-02 | 12 |    | Downregulated |
|  | RIF1    | 1.91 | 1.67E-03 | 8  |    | Downregulated |
|  | RSBN1   | 2.36 | 6.26E-03 |    | 9  | Downregulated |
|  | SGPL1   | 4.58 | 1.41E-02 | 4  |    | Downregulated |
|  | SIKE1   | 2.64 | 3.66E-03 |    | 7  | Upregulated   |
|  | SLC7A11 | 3.43 | 3.59E-03 | 55 |    | Downregulated |
|  | SNAP23  | 2.14 | 3.89E-03 | 5  |    | Not found     |
|  | SNHG4   | 5.6  | 2.42E-04 | 17 |    | Not found     |
|  | SPC25   | 1.55 | 1.16E-03 |    | 7  | Downregulated |
|  | SPTBN1  | 3.7  | 3.20E-04 | 12 |    | Downregulated |
|  | STAG2   | 3.19 | 3.72E-03 | 9  |    | Downregulated |
|  | STX16   | 1.91 | 8.50E-04 | 5  |    | Downregulated |
|  | TCEB3   | 2.48 | 3.30E-03 | 7  |    | Not found     |
|  | TFDP2   | 2.5  | 7.21E-06 |    | 19 | Not found     |
|  | TFPI    | 1.9  | 1.06E-04 |    | 12 | Downregulated |
|  | TFRC    | 4.01 | 1.86E-02 | 10 |    | Downregulated |
|  | TLN2    | 1.96 | 1.03E-03 | 2  |    | Upregulated   |
|  | TMX1    | 1.97 | 1.83E-03 |    | 5  | Not found     |
|  | TROVE2  | 1.66 | 1.04E-03 | 27 | 29 | Downregulated |
|  | TSPYL1  | 1.73 | 3.99E-03 | 6  | 5  | Upregulated   |
|  | UBE2D1  | 5.08 | 6.68E-03 |    | 21 | Upregulated   |
|  | UBE2N   | 2.39 | 6.09E-04 |    | 20 | Downregulated |
|  | USP13   | 4.66 | 2.28E-04 | 2  |    | Upregulated   |
|  | RAB6A   | 5.3  | 1.65E-02 |    | 7  | Not found     |
|  | YME1L1  | 1.55 | 3.66E-02 | 7  |    | Downregulated |
|  | ZBTB1   | 1.88 | 8.64E-04 |    | 9  | Downregulated |

Note: Herein, upregulated is indicative of fold change > 0 and downregulated is indicative of fold change < 0

**Appendix Table S2: List of experiments and P values**

| <b>Figure No.</b> | <b>Description</b>                      | <b>P-Value</b> | <b>Method used</b> |
|-------------------|-----------------------------------------|----------------|--------------------|
| <b>Figure 1</b>   |                                         |                |                    |
| 1B                | 0hr-3hr                                 | 0.0006         | Paired t test      |
|                   | 0hr-6hr                                 | 0.0038         | Paired t test      |
|                   | 0hr-24hr                                | 0.2992         | Paired t test      |
| 1E                | 0hr-4hr                                 | 0.0181         | Paired t test      |
|                   | 0hr-24hr                                | 0.902          | Paired t test      |
|                   | 4hr-24hr                                | 0.0071         | Unpaired t test    |
| 1H                | siCon 24hr-siPP2A 24hr                  | 0.0169         | Unpaired t test    |
|                   | siCon 24hr-siMKP1 24hr                  | 0.3059         | Unpaired t test    |
|                   | siCon 24hr-siMKP3 24hr                  | 0.0867         | Unpaired t test    |
|                   | siCon 24hr-siSHP1/2 24hr                | 0.2625         | Unpaired t test    |
| 1K                | siCon-siPP2A (let7a)                    | 0.001          | Paired t test      |
|                   | siCon-siPP2A (miR155)                   | 0.0002         | Paired t test      |
|                   | siCon-siPP2A (miR146a)                  | 0.0039         | Paired t test      |
| 1L                | siCon-siPP2A (IL-1 $\beta$ )            | 0.0198         | Paired t test      |
| <b>Figure 2</b>   |                                         |                |                    |
| 2C                | 24hrLPS-24hrLPS with OA                 | 0.0009         | Unpaired t test    |
| 2F                | 14hr DOX without OA-24hr DOX without OA | 0.0216         | Paired t test      |
|                   | 14hr DOX with OA-24hr DOX with OA       | 0.1241         | Paired t test      |
|                   | 24hr DOX without OA-24hr DOX with OA    | 0.0056         | Unpaired t test    |
| 2G                | 24hr DOX without OA-24hr DOX with OA    | 0.1365         | Unpaired t test    |
| 2J                | siCon-siPTPA (let7a)                    | 0.0187         | Paired t test      |
|                   | siCon-siPTPA (miR146a)                  | 0.004          | Paired t test      |
| <b>Figure 3</b>   |                                         |                |                    |
| 3C Upper panel    | 0hr-24hr (IL-10)                        | 0.0367         | Paired t test      |
|                   | 0hr-24hr (TNF-a)                        | 0.0463         | Paired t test      |
|                   | 0hr-24hr (IL-6)                         | 0.0374         | Paired t test      |
| 3C lower panel    | 0hr-24hr (IL-10)                        | 0.04658        | Paired t test      |

|                   |                                                            |                              |                    |
|-------------------|------------------------------------------------------------|------------------------------|--------------------|
|                   | 0hr-24hr (TNF-a)                                           | 0.038                        | Paired t test      |
|                   | 0hr-24hr (IL-6)                                            | 0.04215                      | Paired t test      |
| <b>Figure No.</b> | <b>Description</b>                                         | <b>P-Value</b>               | <b>Method used</b> |
| 3E                | 0hr-4hr Ld                                                 | 0.0344                       | Paired t test      |
|                   |                                                            |                              |                    |
| 3G                | - Ld vs + Ld                                               | 0.03985                      | Unpaired t test    |
|                   |                                                            |                              |                    |
| 3I                | siCon 0hr-siCon 4hr                                        | 0.0202                       | Paired t test      |
|                   | siPP2A 0hr-siPP2A 4hr                                      | 0.076                        | Paired t test      |
|                   | siCon 4hr-siPP2A 4hr                                       | 0.0179                       | Unpaired t test    |
|                   |                                                            |                              |                    |
| <b>Figure 4</b>   |                                                            |                              |                    |
| 4A                | siCon 24hr- siPP2A 24hr (IL-10)/RAW264.7                   | 0.0222                       | Unpaired t test    |
|                   | siCon 24hr- siPP2A 24hr (IL-10)/PEC                        | 0.0107                       | Unpaired t test    |
|                   | siCon 24hr- siPP2A 24hr (IL-6)/RAW264.7                    | 0.0048                       | Unpaired t test    |
|                   | siCon 24hr- siPP2A 24hr (IL-6)/PEC                         | 0.0017                       | Unpaired t test    |
|                   | siCon 24hr- siPP2A 24hr (IL-6)/RAW264.7 [Elisa]            | 0.0008                       | Unpaired t test    |
| 4C left panel     | siCon-siPP2A                                               | < 0.0001                     | Unpaired t test    |
| 4C Right panel    | siCon-siPP2A                                               | 0.0149                       | Paired t test      |
|                   |                                                            |                              |                    |
| 4D                | siCon 24hr-siPP2A 24hr (WT)                                | 0.03365                      | Unpaired t test    |
|                   | siCon 24hr-siPP2A 24hr (Y529F)                             | 0.1196                       | Unpaired t test    |
|                   |                                                            |                              |                    |
| 4F left panel     | WT-Y529F (TNF-a)                                           | 0.4137                       | Paired t test      |
|                   | WT-Y529F (IL-1 $\beta$ )                                   | 0.0151                       | Paired t test      |
|                   | WT-Y529F (IL-10)                                           | 0.0199                       | Paired t test      |
| 4F Right panel    | WT-Y529F                                                   | < 0.0001                     | Unpaired t test    |
| 4G                | 2hours without OA-2hours with OA                           | 0.2492                       | Unpaired t test    |
|                   | 24hours without OA-24hours with OA                         | 0.0004                       | Unpaired t test    |
|                   |                                                            |                              |                    |
| <b>Figure 5</b>   |                                                            |                              |                    |
| 5B                | -LPS+LPS (Let-7a)                                          | 0.0211                       | Unpaired t test    |
| 5C                | -LPS +LPS (let-7a)/(miR-155)                               | 0.0264/ 0.0393               | Paired t test      |
| 5D                | - GW4869, +GW4869 (let-7a /miR-155)                        | 0.0023 /0.00053              | Paired t test      |
| 5E                | - GW4869, +GW4869 (TNF- $\alpha$ /IL-6)                    | 0.0009/ 0.0021               | Paired t test      |
| 5F                | - siCon, siHuR(TNF- $\alpha$ )/IL-6/IL-1 $\beta$ /miR-155) | 0.0329/0.0381/0.0193/ 0.0221 | Paired t test      |

| 5G                | siCon-siHuR                             | 0.0009         | Paired t test      |
|-------------------|-----------------------------------------|----------------|--------------------|
| <b>Figure No.</b> | <b>Description</b>                      | <b>P-Value</b> | <b>Method used</b> |
| 5I left panel     | pCIneo-HA HUR(without LPS)              | 0.0592         | Paired t test      |
|                   | pCIneo-HA HUR(with LPS)                 | 0.0149         | Unpaired t test    |
| 5I right panel    | pCIneo-HA HUR(without LPS)              | 0.0086         | Unpaired t test    |
|                   | pCIneo-HA HUR(with LPS)                 | 0.0111         | Unpaired t test    |
| 5L lower panel    | without MG132-with MG132                | 0.015          | Paired t test      |
| <b>Figure 6</b>   |                                         |                |                    |
| 6C                | pCIneo-HA HUR (PP2A A subunit)          | 0.0018         | Paired t test      |
|                   | pCIneo-HA HUR (PP2A B subunit)          | 0.0021         | Paired t test      |
|                   | pCIneo-HA HUR (PP2A C $\alpha$ subunit) | 0.0171         | Paired t test      |
| <b>Figure 7</b>   |                                         |                |                    |
| 7B                | untransfected-HA HUR                    | < 0.0001       | Unpaired t test    |
|                   | transfected                             |                |                    |
| 7C                | pCIneo-HA HUR 24hr Ld(TNF-a)            | 0.019          | Paired t test      |
|                   | pCIneo-HA HUR 24hr Ld(IL-1 $\beta$ )    | 0.0214         | Paired t test      |
|                   | pCIneo-HA HUR 24hr Ld(IL-10)            | 0.0024         | Paired t test      |
| 7D                | uninfected- 10days infection            | 0.0003         | Unpaired t test    |
|                   | uninfected- 35days infection            | < 0.0001       | Unpaired t test    |
| 7G                | pCI neo-HAHUR (Ld count) dot plot       | 0.0026         | Unpaired t test    |
|                   | pCI neo-HAHUR (Ld count) histogram      | 0.0002         | Paired t test      |
| 7H                | pCI neo-HAHUR (TNF-a) dot plot          | 0.0069         | Unpaired t test    |
|                   | pCI neo-HAHUR (TNF-a) histogram         | 0.0249         | Paired t test      |
| 7I                | pCI neo-HAHUR (IL-10) dot plot          | 0.0119         | Unpaired t test    |
|                   | pCI neo-HAHUR (IL-10) histogram         | 0.0258         | Paired t test      |



|                   |                                                       |                |                    |
|-------------------|-------------------------------------------------------|----------------|--------------------|
| 7K                | pCI neo-HAHUR (TNF-a)<br>histogram Spleen             | 0.7299         | Paired t test      |
| <b>Figure No.</b> | <b>Description</b>                                    | <b>P-Value</b> | <b>Method used</b> |
| <b>Figure 8</b>   |                                                       |                |                    |
| 8A                | control-Lds (IL-10)                                   | 0.0006         | Paired t test      |
|                   | control-Ldr (IL-10)                                   | 0.035          | Paired t test      |
|                   | Lds-Ldr (IL-10)                                       | 0.0277         | Unpaired t test    |
|                   |                                                       |                |                    |
| 8B                | control-Lds (TNF-a)                                   | 0.0267         | Paired t test      |
|                   | control-Ldr (TNF-a)                                   | 0.024          | Paired t test      |
|                   |                                                       |                |                    |
| 8C                | control-Lds                                           | 0.0105         | Paired t test      |
|                   | control-Ldr                                           | 0.0115         | Paired t test      |
|                   | Lds-Ldr                                               | 0.0061         | Unpaired t test    |
|                   |                                                       |                |                    |
|                   |                                                       |                |                    |
| 8F                | pCI Neo without OA-pCI Neo with<br>OA (IL-1 $\beta$ ) | 0.0004         | Paired t test      |
|                   | HA HUR without OA-HA HUR<br>with OA (IL-1 $\beta$ )   | 0.0088         | Paired t test      |
|                   |                                                       |                |                    |
|                   | pCI Neo without OA-pCI Neo with<br>OA (TNF-a)         | 0.703          | Paired t test      |
|                   | HA HUR without OA-HA HUR<br>with OA (TNF-a)           | 0.0177         | Paired t test      |
|                   |                                                       |                |                    |
| 8H                | pCI Neo without OA-HA HUR<br>with OA (TNF-a)          | 0.026          | Paired t test      |
|                   | HA HUR without OA-HA HUR<br>with OA (TNF-a)           | 0.012          | Unpaired t test    |
|                   |                                                       |                |                    |
|                   | pCI Neo without OA-HA HUR<br>with OA (IL-1 $\beta$ )  | 0.0056         | Paired t test      |
|                   | HA HUR without OA-HA HUR<br>with OA (IL-1 $\beta$ )   | 0.0018         | Unpaired t test    |
|                   |                                                       |                |                    |
|                   | pCI Neo without OA-HA HUR<br>with OA (Ld count)       | < 0.0001       | Paired t test      |
|                   | HA HUR without OA-HA HUR<br>with OA (Ld count)        | 0.0001         | Unpaired t test    |
| <b>Figure EV1</b> |                                                       |                |                    |
| EV1E              | 0h/24h LPS PP2AA                                      | 0.0493         | Paired t test      |
|                   | 0h/24h LPS PP2AB                                      | 0.0015         | Paired t test      |
|                   | 0h/24h LPS PP2ACa                                     | 0.0003         | Paired t test      |
| <b>Figure EV2</b> |                                                       |                |                    |
| EV2B              | control-Ld 24hr                                       | 0.0011         | Paired t test      |
|                   | Ld 24hr-Ld 24hr heat killed                           | 0.0003         | Unpaired t test    |

|                   |                            |                |                    |
|-------------------|----------------------------|----------------|--------------------|
|                   |                            |                |                    |
| EV2F              | control-LPS 4hr            | 0.0011         | Paired t test      |
|                   | control-LPS 4hr+anti TLR4  | 0.0036         | Paired t test      |
|                   | LPS 4hr-LPS 4hr+anti TLR4  | < 0.0001       | Unpaired t test    |
|                   |                            |                |                    |
| <b>Figure No.</b> | <b>Description</b>         | <b>P-Value</b> | <b>Method used</b> |
| EV2G              | control-LPS 4hr            | 0.0059         | Paired t test      |
|                   | control-LPS 4hr+anti TLR4  | 0.01           | Paired t test      |
|                   | LPS 4hr-LPS 4hr+anti TLR4  | 0.0137         | Unpaired t test    |
|                   |                            |                |                    |
| EV2H              | control-1U LPG             | 0.1412         | Paired t test      |
|                   | control-10U LPG            | 0.0279         | Paired t test      |
|                   | 10U LPG- 10U LPG+anti TLR4 | 0.0163         | Unpaired t test    |
|                   |                            |                |                    |

**Appendix Table S3 List of Primers used for mRNA detection**

| Target                      | 5'Forward Primer3'                | 5'Reverse Primer3'              |
|-----------------------------|-----------------------------------|---------------------------------|
| TNF- $\alpha$               | GTCTCAGCCTCTTCTCATTCC             | TCCACTTGGTGGTTTGCTA             |
| IL-1 $\beta$                | GACCTTCCAGGATGAGGACA              | CCTTGTACAAAGCTCATGGAG           |
| IL-6                        | AGGATAACCACTCCCAACAGA             | GTACTCCAGAAGACCAGAGGA           |
| IL-10                       | TGCTAACCGACTCCTTAATGC             | ATCACTCTTCACCTGCTCCAC           |
| RL                          | CCAAGCAAGATCATGC                  | GCTCTTGATGTACTTACCC             |
| PP2A- $\alpha$              | GGCCTGTGGTCTCTTCTCAG              | CTCGTCAGAGGCCAGGTTAG            |
| PP2A- $\beta$               | AGCTGGCGTACTGTGTTGTG              | GGAAATGAGAGCTGGAGACG            |
| PP2A-C $\alpha$             | AGAGCGCATCACCATACTCC              | CCAAGGCAGTGAGAGGAAGA            |
| 18SrRNA                     | TGACTCTAGATAACCTCGGG              | GACTCATTCCAATTACAGGG            |
| Parasite<br>specific primer | CCTATTTTACACCAACCCCCAGT<br>(JW11) | GGGTAGGGGCGTTCTGCGAAA<br>(JW12) |

**Appendix Table S4** List of antibodies used

| <b>Antibody names</b> | <b>Raised in</b>                  | <b>Dilution</b> | <b>Source</b>                       |
|-----------------------|-----------------------------------|-----------------|-------------------------------------|
| 4G10                  | Mouse                             | 1:1000          | Millipore                           |
| AGO2 (EIF2C2)         | Mouse                             | 1:1000          | Abnova                              |
| Alix                  | Mouse                             | 1:200           | Santa cruz                          |
| $\beta$ -Actin        | Mouse Monoclonal (HRP conjugated) | 1:10000         | Sigma Aldrich                       |
| HA                    | Rat monoclonal                    | 1:1000          | Roche                               |
| HRS                   | Rabbit                            | 1:1000          | Bethyl                              |
| HuR                   | Mouse                             | 1:1000          | Santa cruz                          |
| MKP1                  | Rabbit                            | 1:1000          | Kind gift from Dr. Pijush Kanti Das |
| MKP3                  | Rabbit                            | 1:1000          | Kind gift from Dr. Pijush Kanti Das |
| MSK1/2                | Rabbit                            | 1:1000          | Cell signalling                     |
| PP2A                  | Rabbit                            | 1:1000          | Santacruz                           |
| PTPA                  | Mouse                             | 1:1000          | Millipore                           |
| p38                   | Rabbit                            | 1:1000          | Cell signalling                     |
| p-P38                 | Rabbit                            | 1:1000          | Cell signalling                     |
| p-Msk1/2              | Rabbit                            | 1:1000          | Cell signalling                     |
| SHP1/2                | Rabbit                            | 1:1000          | Kind gift from Dr. Pijush Kanti Das |
| ERK                   | Rabbit                            | 1:1000          | Cell signalling                     |
| p-ERK                 | Rabbit                            | 1:1000          | Cell signalling                     |
| Dicer1                | Rabbit                            | 1:5000          | Bethyl                              |
| MDR1                  | Rabbit                            | 1:500           | Novus Biologicals                   |

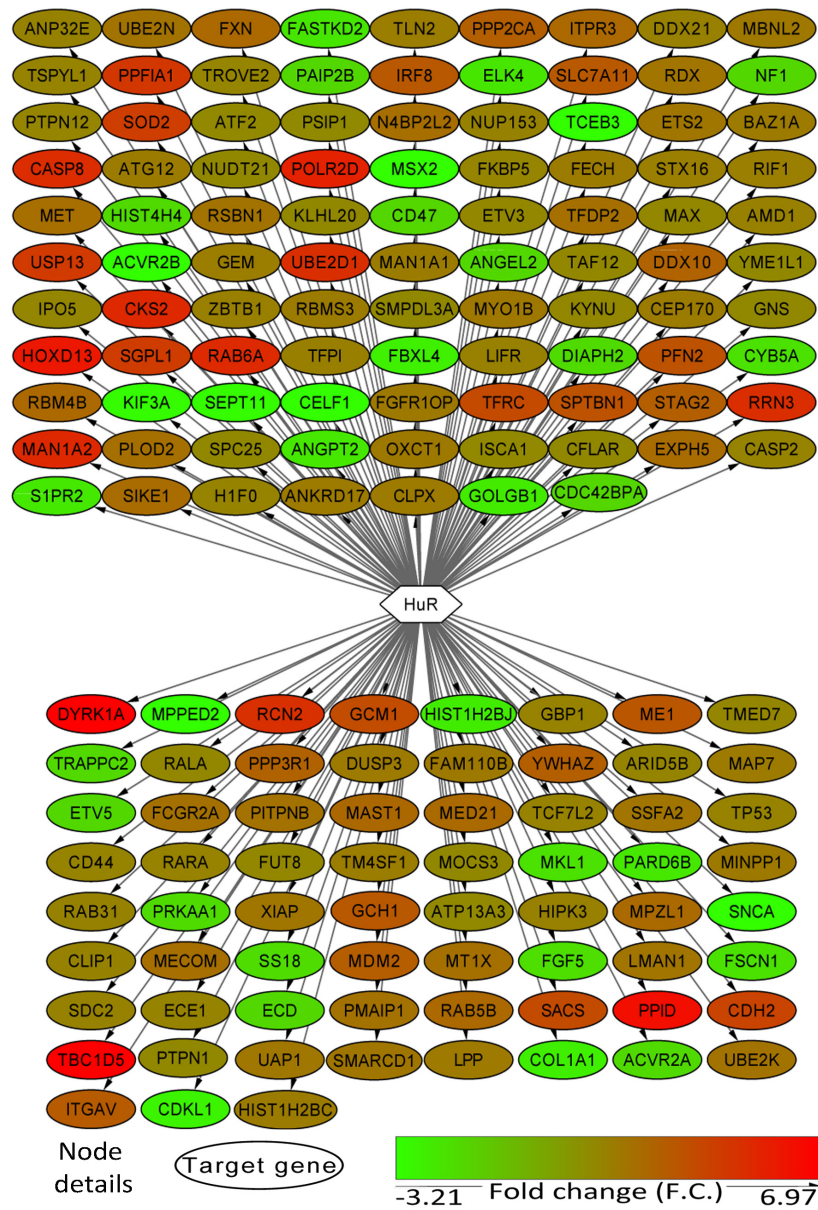

### Appendix Figure S1 Status of HuR target genes in *L. donovani* infected macrophages.

HuR regulated genes that may be targeted in *Ld* infected cells based on their differential expression upon *L. donovani* infection in macrophages is outlined here. Note: The node colour is indicative of fold change (F.C.) in gene expression of respective HuR target genes in *L. donovani* infected macrophages. The complete set of differentially expressed probable HuR regulated genes have been listed in Appendix Table S1.
