# Supplementary material for: MicroRNA exporter HuR clears the internalized pathogens by promoting pro‐inflammatory response in infected macrophages
Source: PubMed Central journal article supplement (PMC7059013; doi:10.15252/emmm.201911011), 2020-02-07
Supplement: EMMM-12-e11011-s003.pdf [file EMMM-12-e11011-s003.pdf]

Fig 1 D

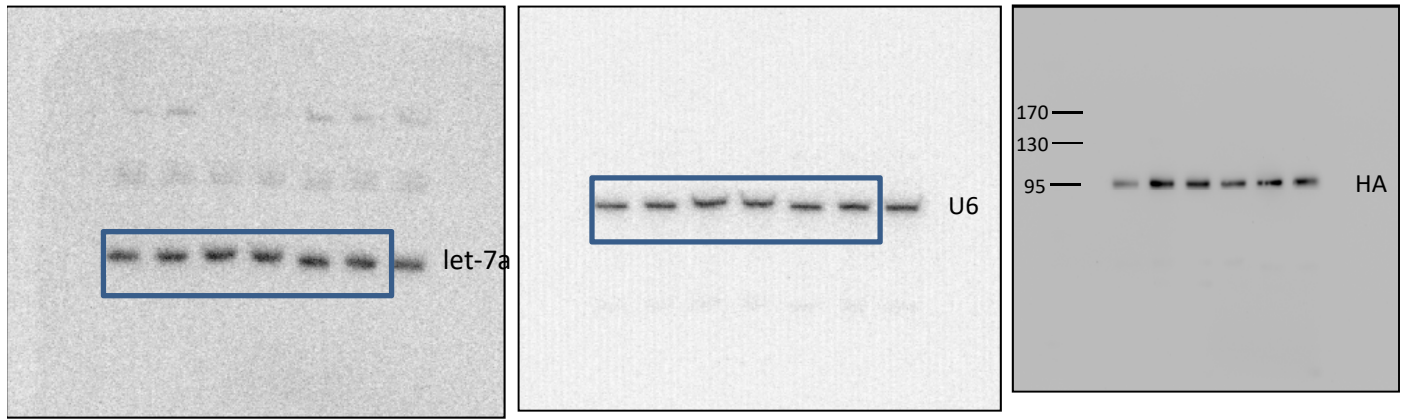

Figure 1 Goswami et al. Source Data File

Fig 1 E

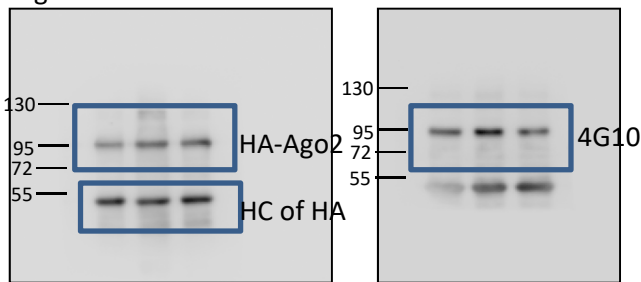

Fig 1 F

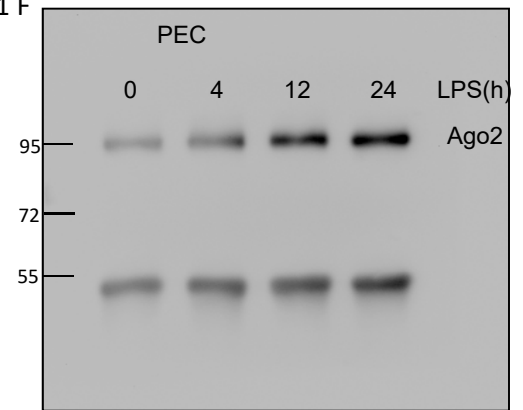

Fig 1 G

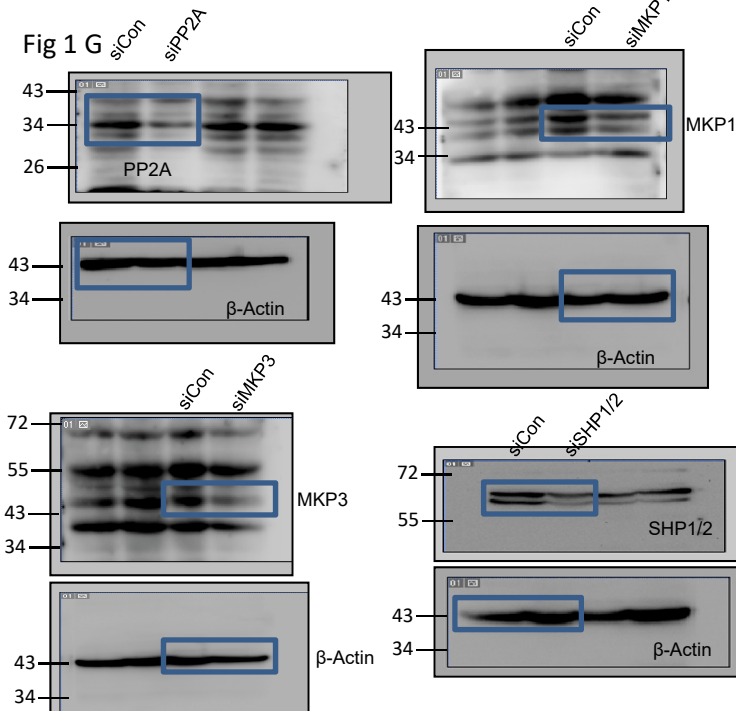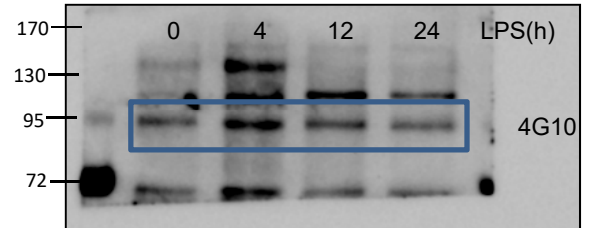

Fig 1 J

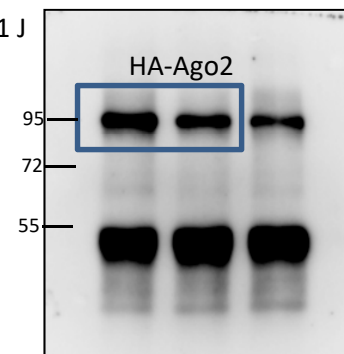

Fig 1 I

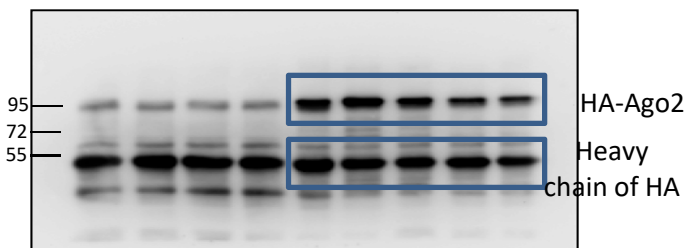

Fig 1 J

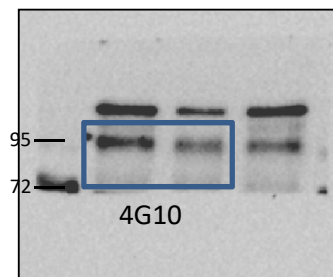

Fig 1 B

|   | A   | B        | C        | D        |
|---|-----|----------|----------|----------|
|   | 0hr | 3hr      | 6hr      | 24hr     |
|   | Y   | Y        | Y        | Y        |
| 1 | 1   | 0.422712 | 0.542606 | 0.946184 |
| 2 | 1   | 0.435500 | 0.631432 | 0.833658 |
| 3 | 1   | 0.468260 | 0.576060 | 1.007734 |
| 4 |     |          |          |          |
| 5 |     |          |          |          |
| 6 |     |          |          |          |

Fig 1 C

|   | X       | A     |       |       |      | B     |       |      |
|---|---------|-------|-------|-------|------|-------|-------|------|
|   | X Title | TNFa  |       |       |      | IL-6  |       |      |
|   | X       | A:Y1  | A:Y2  | A:Y3  | A:Y4 | B:Y1  | B:Y2  | B:Y3 |
| 1 | 0hr     | 1.00  | 1.00  | 1.00  |      | 1.00  | 1.00  |      |
| 2 | 3hr     | 59.56 | 61.18 | 51.48 |      | 28.42 | 67.77 |      |
| 3 | 6hr     | 33.32 | 35.20 | 15.96 |      | 22.33 | 33.55 |      |
| 4 | 9hr     | 4.51  | 23.03 | 11.69 |      | 5.37  | 22.63 |      |
| 5 | 12hr    | 6.50  | 7.99  | 6.08  |      | 3.30  | 11.34 |      |
| 6 | 24hr    | 5.45  | 3.88  | 6.08  |      | 3.86  | 2.94  |      |
| 7 | Title   |       |       |       |      |       |       |      |

Fig 1 E

|   | A   | B        | C        |
|---|-----|----------|----------|
|   | 0hr | 4hr      | 24hr     |
|   | Y   | Y        | Y        |
| 1 | 1   | 1.400000 | 0.930000 |
| 2 | 1   | 1.495622 | 0.898313 |
| 3 | 1   | 1.640000 | 1.140000 |
| 4 |     |          |          |

Fig 1 H

|   | A          | B          | C          | D          | E          | F          | G          | H          | I          | J          |
|---|------------|------------|------------|------------|------------|------------|------------|------------|------------|------------|
|   | Data Set-A | Data Set-B | Data Set-C | Data Set-D | Data Set-E | Data Set-F | Data Set-G | Data Set-H | Data Set-I | Data Set-J |
|   | Y          | Y          | Y          | Y          | Y          | Y          | Y          | Y          | Y          | Y          |
| 1 | 1.000000   | 1.108900   | 1.000000   | 0.885062   | 1.000000   | 0.788615   | 1.000000   | 0.936161   | 1.000000   | 0.872256   |
| 2 | 1.000000   | 1.044056   | 1.000000   | 0.837793   | 1.000000   | 0.886203   | 1.000000   | 0.941840   | 1.000000   | 1.024331   |
| 3 | 1.000000   | 1.399706   | 1.000000   | 0.856994   | 1.000000   | 1.310343   | 1.000000   | 1.009231   | 1.000000   | 1.166889   |
| 4 | 1.000000   | 1.543749   | 1.000000   | 0.937329   | 1.000000   | 1.301342   | 1.000000   | 1.153963   | 1.000000   | 1.293984   |
