# Supplementary material for: MicroRNA exporter HuR clears the internalized pathogens by promoting pro‐inflammatory response in infected macrophages
Source: PubMed Central journal article supplement (PMC7059013; doi:10.15252/emmm.201911011), 2020-02-07
Supplement: EMMM-12-e11011-s004.pdf [file EMMM-12-e11011-s004.pdf]

Fig 2 B

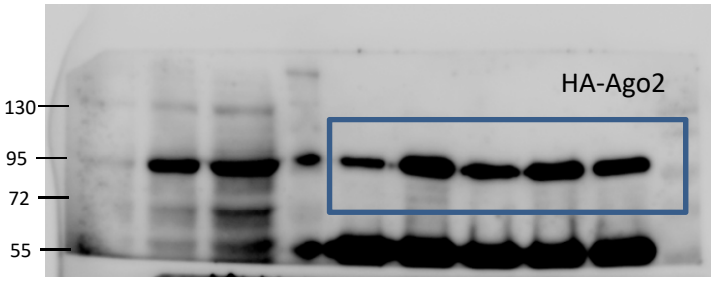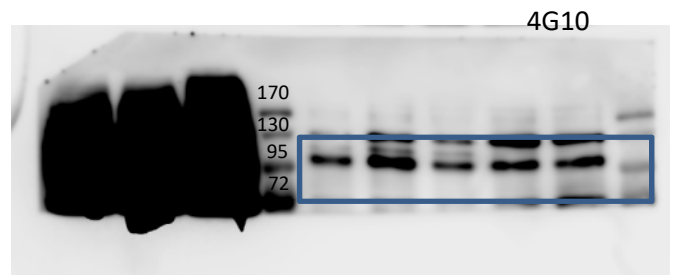

Fig 2 D

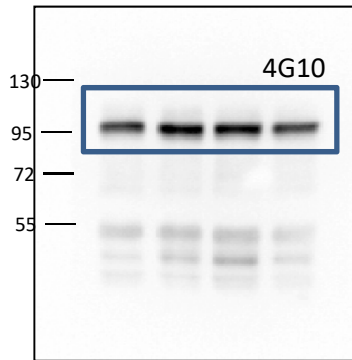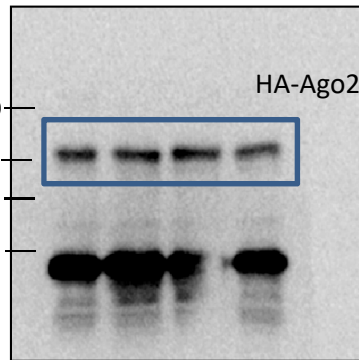

Fig 2 F

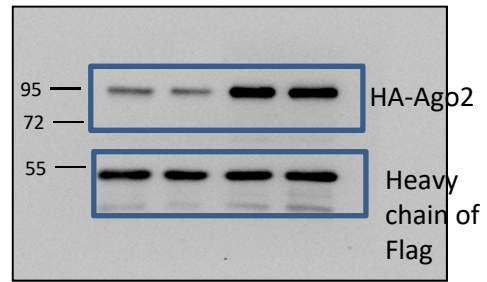

Fig 2 H

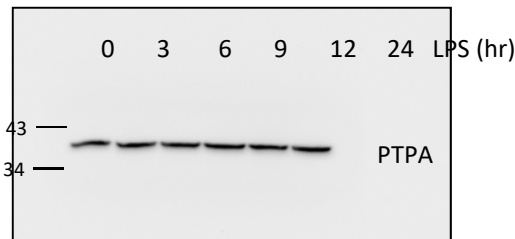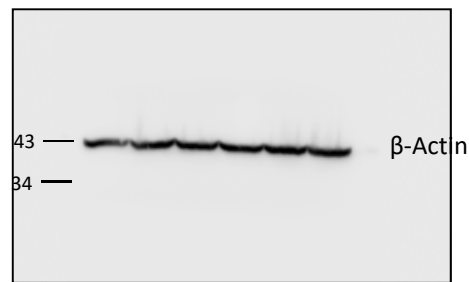

Fig 2 I

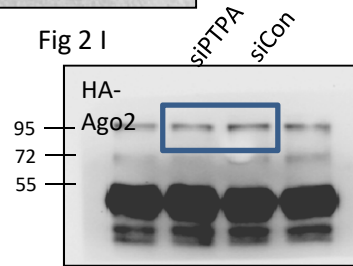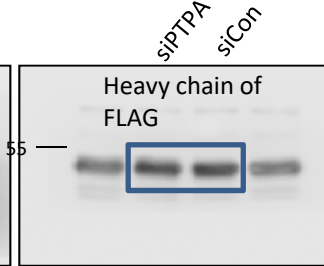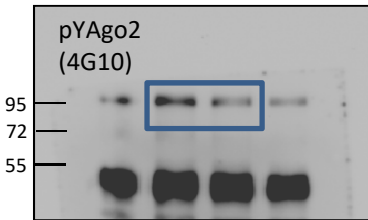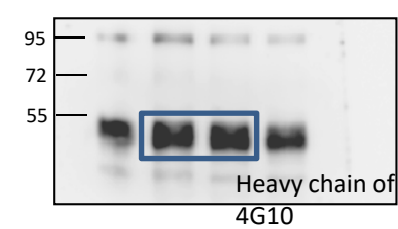

Fig 2 I

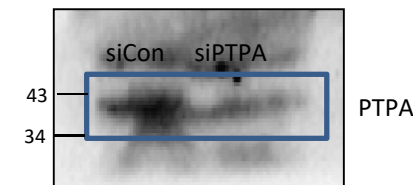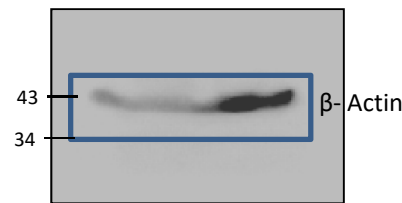

Fig 2 K

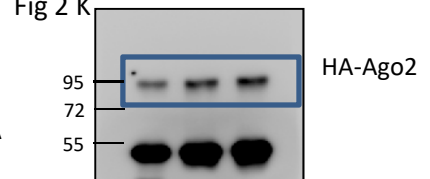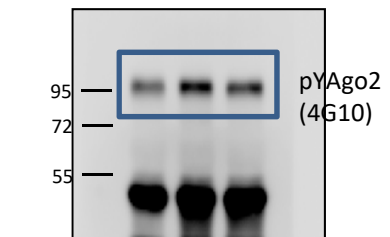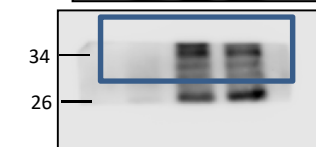

Fig 2 H

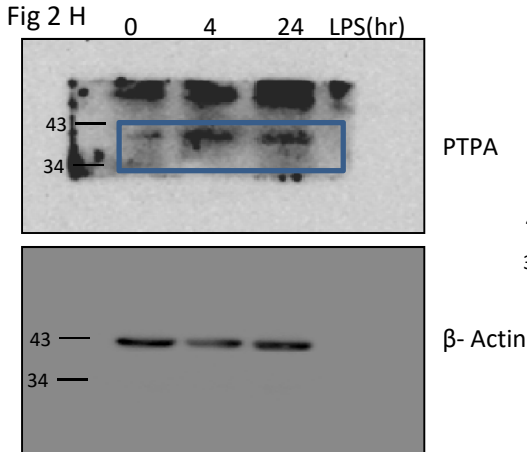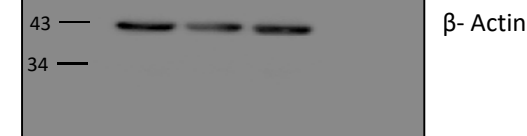

Fig 2 C

|   | A          | B          | C          | D          |
|---|------------|------------|------------|------------|
|   | Data Set-A | Data Set-B | Data Set-C | Data Set-D |
|   | Y          | Y          | Y          | Y          |
| 1 | 1          | 1.426685   | 0.631418   | 0.679305   |
| 2 | 1          | 1.696200   | 0.613010   | 0.695335   |
| 3 | 1          | 1.474422   | 0.665683   | 0.793478   |
| 4 |            |            |            |            |
| 5 |            |            |            |            |
| 6 |            |            |            |            |

Fig 2 F

|   | A        | B         | C        | D        |
|---|----------|-----------|----------|----------|
|   | 14hr DOX | 24hr DOX  | 14hr DOX | 24hr DOX |
|   | Y        | Y         | Y        | Y        |
| 1 | 1.000000 | 4.505352  | 1.000000 | 1.090000 |
| 2 | 1.000000 | 5.189962  | 1.000000 | 1.020000 |
| 3 | 1.000000 | 10.450000 | 1.000000 | 1.360000 |
| 4 | 1.000000 | 8.230000  | 1.000000 | 1.520000 |

Fig 2 J

|   | A     | B      | C     | D     | E      |
|---|-------|--------|-------|-------|--------|
|   | siCon | siPTPA | Title | siCon | siPTPA |
|   | Y     | Y      | Y     | Y     | Y      |
| 1 | 1     | 0.65   |       | 1     | 0.59   |
| 2 | 1     | 0.60   |       | 1     | 0.54   |
| 3 | 1     | 0.45   |       | 1     | 0.63   |
