# Supplementary material for: MicroRNA exporter HuR clears the internalized pathogens by promoting pro‐inflammatory response in infected macrophages
Source: PubMed Central journal article supplement (PMC7059013; doi:10.15252/emmm.201911011), 2020-02-07
Supplement: EMMM-12-e11011-s006.pdf [file EMMM-12-e11011-s006.pdf]

Figure 4 Goswami et al. Source Data File

Fig 4 A IL-10 RAW264.7

|   | A          | B          | C          | D          |
|---|------------|------------|------------|------------|
|   | Data Set-A | Data Set-B | Data Set-C | Data Set-D |
|   | Y          | Y          | Y          | Y          |
| 1 | 1.000000   | 1.537729   | 0.781443   | 0.928040   |
| 2 | 1.000000   | 2.418997   | 1.694886   | 0.757679   |
| 3 | 1.000000   | 1.596018   | 1.000000   | 0.541777   |

Fig 4 A IL-10 PEC

|   | A          | B          | C          | D          |
|---|------------|------------|------------|------------|
|   | Data Set-A | Data Set-B | Data Set-C | Data Set-D |
|   | Y          | Y          | Y          | Y          |
| 1 | 1.000000   | 4.207189   | 1.000000   | 0.565335   |
| 2 | 1.000000   | 2.367449   | 1.000000   | 0.851650   |
| 3 | 1.000000   | 3.265961   | 1.000000   | 1.018774   |

Fig 4 A IL-6 RAW264.7

|   | A          | B          | C          | D          |
|---|------------|------------|------------|------------|
|   | Data Set-A | Data Set-B | Data Set-C | Data Set-D |
|   | Y          | Y          | Y          | Y          |
| 1 | 1.000000   | 0.648439   | 1.542318   | 2.038601   |
| 2 | 1.000000   | 0.769282   | 1.241749   | 1.977278   |
| 3 | 1.000000   | 0.512623   | 0.586573   | 1.429170   |

Fig 4 A IL-6 PEC

|   | A          | B          | C          | D          |
|---|------------|------------|------------|------------|
|   | Data Set-A | Data Set-B | Data Set-C | Data Set-D |
|   | Y          | Y          | Y          | Y          |
| 1 | 1.000000   | 0.535887   | 1.000000   | 1.420151   |
| 2 | 1.000000   | 0.445141   | 1.000000   | 1.907477   |
| 3 | 1.000000   | 0.793151   | 1.000000   | 1.420763   |
| 4 | 1.000000   | 0.609205   |            |            |

Fig 4 C left panel

|                             |    | A     | B      |
|-----------------------------|----|-------|--------|
|                             |    | siCon | siPP2A |
|                             |    | Y     | Y      |
| siPP2A_IP_Let7a_miR155_146a |    |       |        |
| miR155                      |    |       |        |
| miR122                      |    |       |        |
| siC siP                     |    |       |        |
| LPS                         | 1  | 3.00  | 2.00   |
| Data 8                      | 2  | 4.00  | 1.00   |
| Data 9                      | 3  | 3.00  | 1.00   |
| tnfa_siPP2A                 | 4  | 2.00  | 2.00   |
| IL-6_siPP2A                 | 5  | 3.00  | 2.00   |
| <b>Ld internalization</b>   |    |       |        |
| IL-10_siPP2A                | 6  | 3.00  | 1.00   |
| siphsphatases               | 7  | 4.00  | 3.00   |
| TNFa_tolerance              | 8  | 3.00  | 2.00   |
| siPTPA_IP_Let7a_146a        | 9  | 3.00  | 1.00   |
| dox_RNP Biogenesis          | 10 | 2.00  | 3.00   |
| Tolerance                   | 11 | 2.00  | 2.00   |
| il-1b siPTPA                | 12 | 4.00  | 2.00   |
| IL-6 siPTPA                 | 13 | 3.00  | 1.00   |
| siPTPA_IP_IL1b_il6_IL-10    | 14 | 3.00  | 1.00   |
| dox_biogenesis_122          | 15 | 4.00  | 2.00   |
| dox_biogenesis_let7a        | 16 | 3.00  | 1.00   |
| Data 24                     | 17 | 3.00  | 1.00   |
| il10_siPTPA                 | 18 | 4.00  | 1.00   |
| ros production              | 19 | 3.00  | 2.00   |
| tolerance_il1b              | 20 | 3.00  | 1.00   |
| tolerance_il10              | 21 |       |        |
| yf_IL-6_pp2a                |    |       |        |
| Data 31                     |    |       |        |
| Data 32                     |    |       |        |
| WT/YF_pp2A_IL-10            |    |       |        |
| PEC_LD_cytokine             |    |       |        |
| PEC_OA_IL6                  |    |       |        |
| PEC_OA_IL10                 |    |       |        |

Fig 4 C Right panel

|                                     |   | A         | B          |
|-------------------------------------|---|-----------|------------|
|                                     |   | siCon_LPS | siPP2A_LPS |
|                                     |   | Y         | Y          |
| Ago2 associated Let7a LPS timepoint |   |           |            |
| Data 85                             |   |           |            |
| Data 86                             |   |           |            |
| pp2a c subunit heat killed          | 1 | 1         | 0.6400     |
| I major cytokine tnf il10           | 2 | 1         | 0.5800     |
| heat killed tnfa level              | 3 | 1         | 0.4548     |
| heat killed il 10 level             |   |           |            |
| Data 91                             |   |           |            |

Fig 4 F Left panel

|                       |   | WT | YF       | WT | YF       | WT | YF       |
|-----------------------|---|----|----------|----|----------|----|----------|
|                       |   | Y  | Y        | Y  | Y        | Y  | Y        |
| Data 43               |   |    |          |    |          |    |          |
| dox_cellular          |   |    |          |    |          |    |          |
| dox_IP                |   |    |          |    |          |    |          |
| <b>WT_YF_OA_LD</b>    | 1 | 1  | 0.789400 | 1  | 0.760094 | 1  | 1.708484 |
| pci hahuR_PP2A levels | 2 | 1  | 0.374507 | 1  | 0.663194 | 1  | 1.581001 |
| Data 49               | 3 | 1  | 0.914635 | 1  | 0.629036 | 1  | 1.425150 |
| Data 50               |   |    |          |    |          |    |          |
