# Supplementary material for: MicroRNA exporter HuR clears the internalized pathogens by promoting pro‐inflammatory response in infected macrophages
Source: PubMed Central journal article supplement (PMC7059013; doi:10.15252/emmm.201911011), 2020-02-07
Supplement: EMMM-12-e11011-s007.pdf [file EMMM-12-e11011-s007.pdf]

Figure 5 Goswami et al. Source Data File

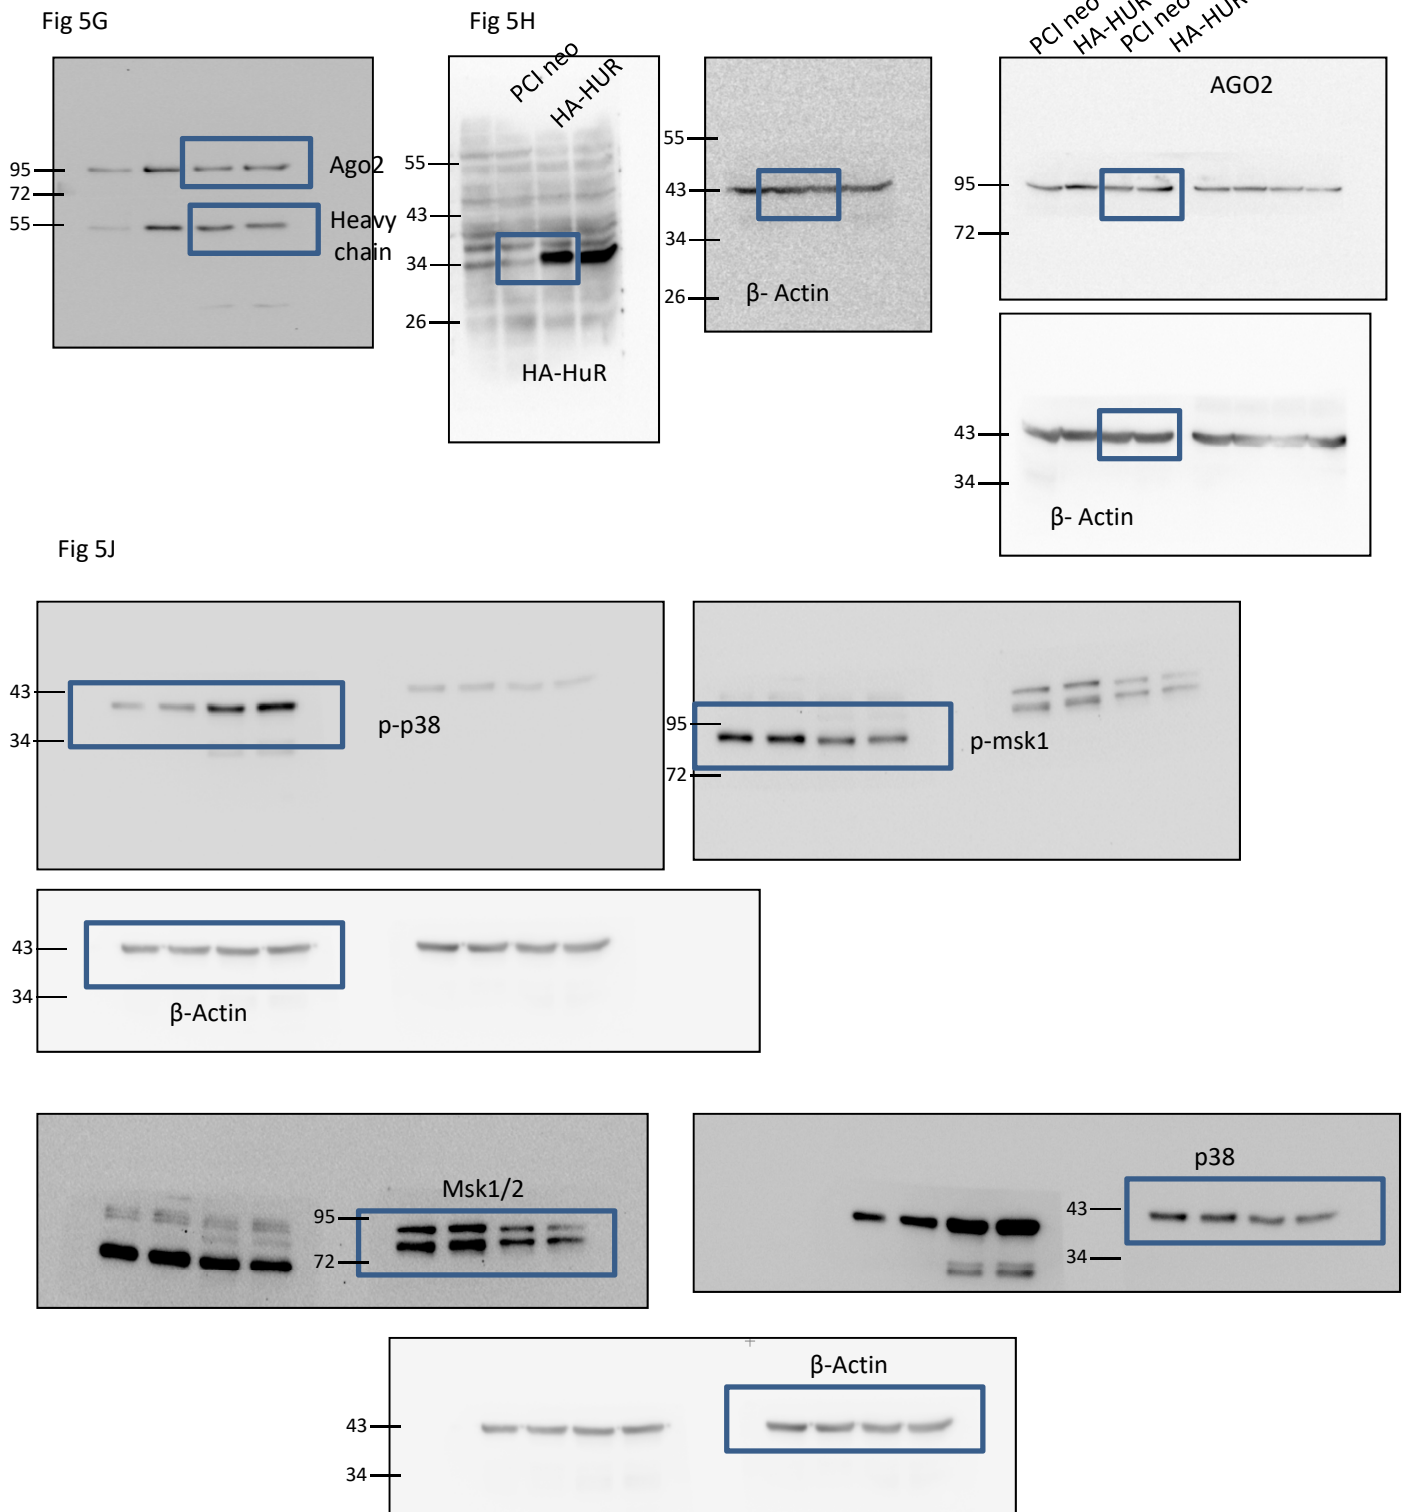

Fig 5K upper left panel

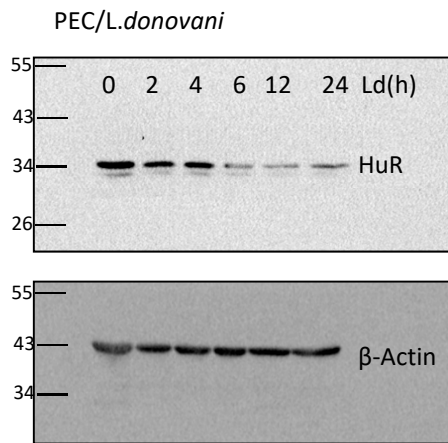

Fig 5K upper right panel

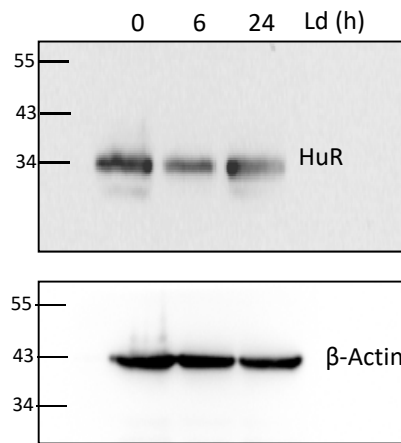

Fig 5K lower right panel

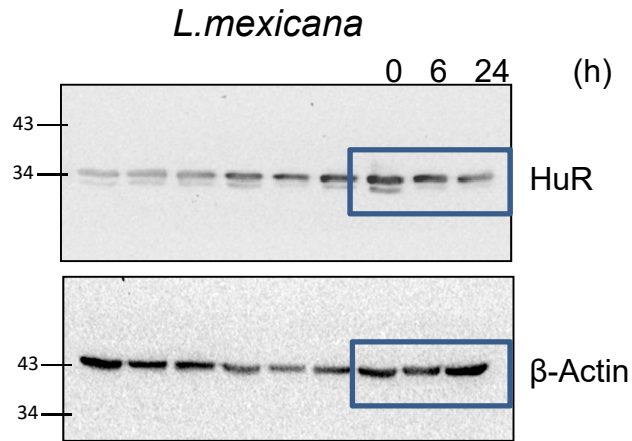

Fig 5K lower left panel

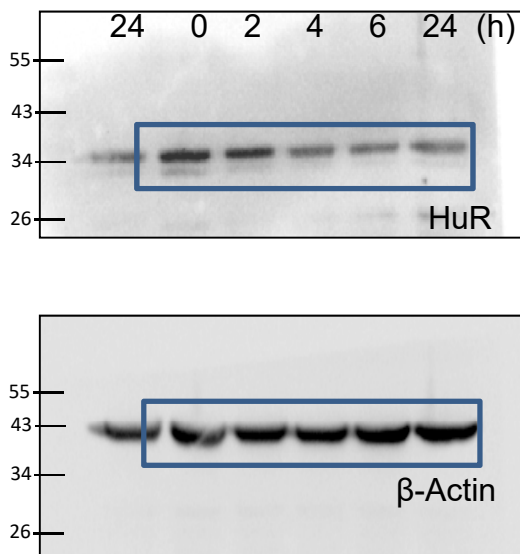

*L.major*

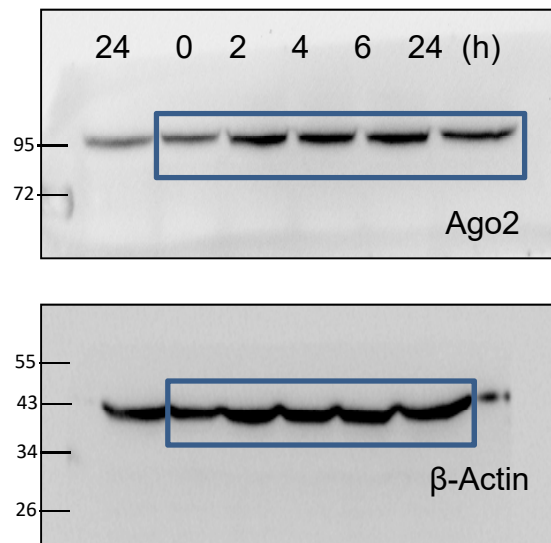

Fig 5L

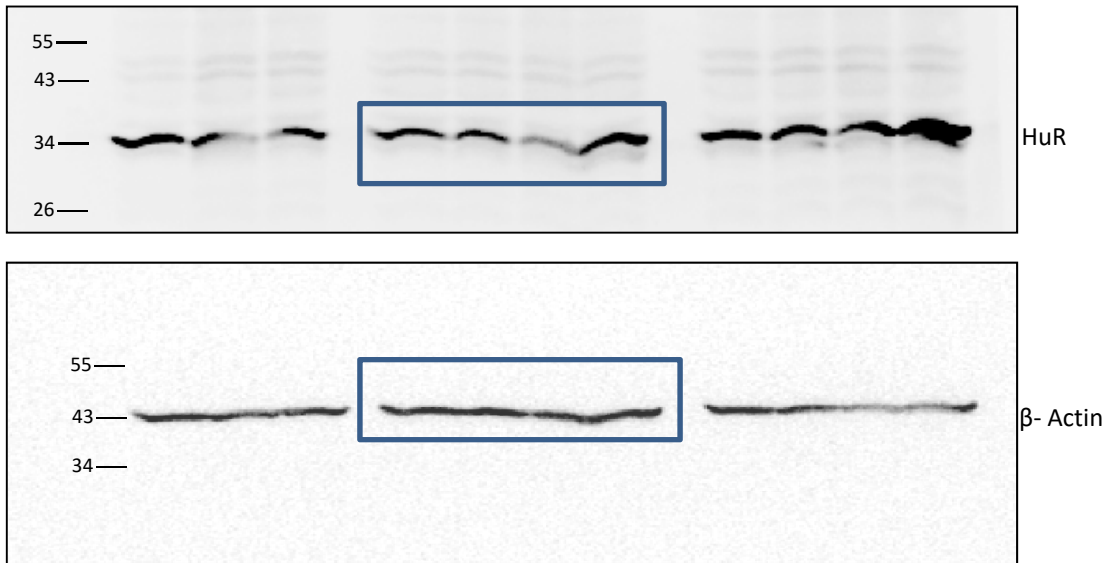

Fig 5M input

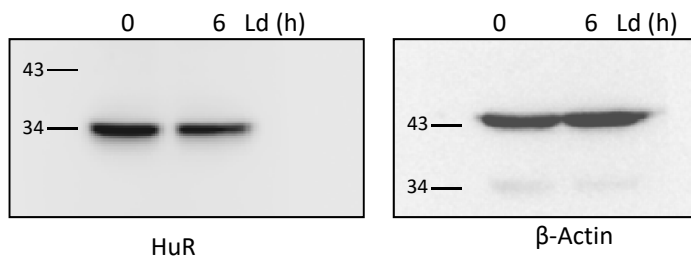

Fig 5M gradient

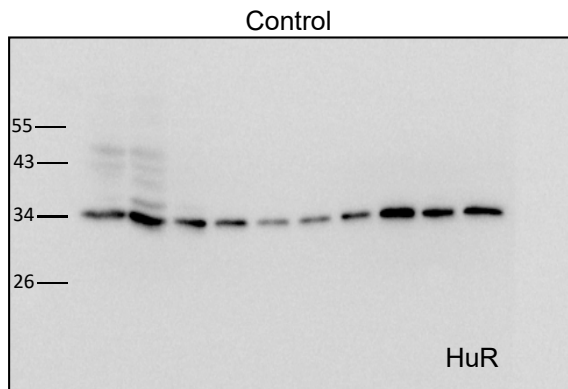

Fig 5N

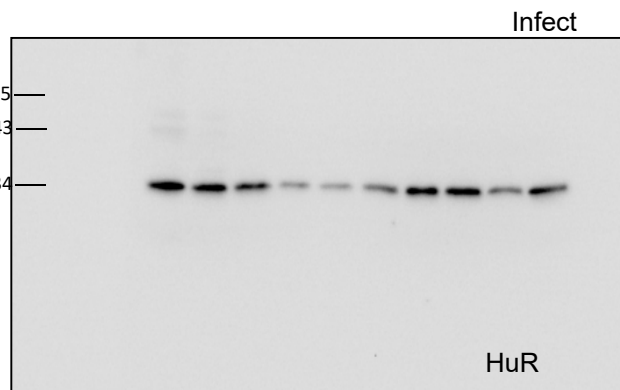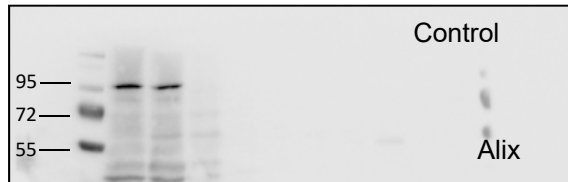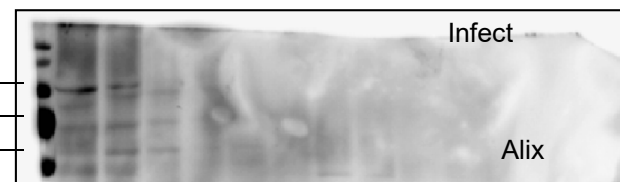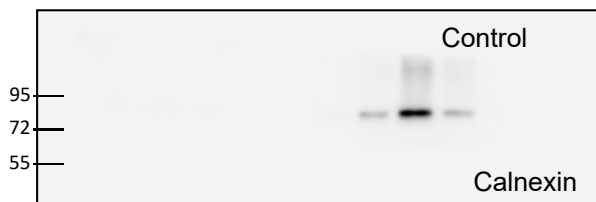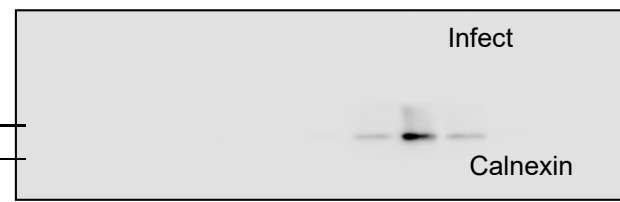

Fig. 5C

| let-7a | HuR bound |  | miR-155 | HuR bound |      |
|--------|-----------|--|---------|-----------|------|
| Wo LPS | W LPS     |  | WoLPS   | W LPS     |      |
|        | 1         |  | 1.51    | 1         | 8.66 |
|        | 1         |  | 1.93    | 1         | 6.31 |
|        | 1         |  | 1.79    | 1         | 4.74 |
|        | 1         |  | 1.79    | 1         | 6.31 |

Fig. 5E

| TNF-a  |       | IL-6     |        |       |              |      |
|--------|-------|----------|--------|-------|--------------|------|
| Wo LPS | W LPS | WLPS +GW | Wo LPS | W LPS | W LPS+GW4869 |      |
|        | 1     | 18.46    | 3.11   | 1     | 20.09        | 2    |
|        | 1     | 21.8     | 0.99   | 1     | 17.52        | 1    |
|        | 1     | 18.5     | 1.62   | 1     | 27.23        | 1.4  |
|        | 1     | 17.29    | 1.91   | 1     | 21.84        | 1.7  |
|        | 1     | 18.48    | 1.765  | 1     | 20.965       | 1.55 |

Fig. 5F

| TNFa      |       | IL-6     |       | IL-1B    |       | miR-155  |       |       |
|-----------|-------|----------|-------|----------|-------|----------|-------|-------|
| con siRNA | SiHuR | ConsiRNA | SiHuR | ConsiRNA | SiHuR | ConsiRNA | SiHuR |       |
|           | 1     | 0.7      | 1     | 0.39     | 1     | 0.47     | 1     | 23.66 |
|           | 1     | 0.42     | 1     | 0.57     | 1     | 0.55     | 1     | 37.6  |
|           | 1     | 0.45     | 1     | 0.7      | 1     | 0.68     | 1     | 39.1  |
|           | 1     | 0.45     | 1     | 0.57     | 1     | 0.55     | 1     | 37.6  |

Fig 5 G

|               | A | B             |
|---------------|---|---------------|
| siCON_6hr LPS |   | siHuR_6hr LPS |
|               | Y | Y             |
| 1             | 1 | 2.445110      |
| 2             | 1 | 2.312739      |
| 3             | 1 | 2.432898      |

Fig 5 I left panel

|             | A    | B          | C           | D          |
|-------------|------|------------|-------------|------------|
| PCI_Neo-LPS |      | HA_HuR-LPS | PCI_Neo+LPS | HA_HuR+LPS |
|             | Y    | Y          | Y           | Y          |
| 1           | 1.00 | 1.80       | 3.18        | 3.81       |
| 2           | 1.00 | 2.53       | 2.85        | 4.30       |
| 3           | 1.00 | 3.10       | 3.14        | 5.42       |

FIG 5 I right panel

|         | A          | B           | C           | D           |
|---------|------------|-------------|-------------|-------------|
| neo-LPS |            | HuR-LPS     | neo+LPS     | HuR+LPS     |
|         | Y          | Y           | Y           | Y           |
| 1       | 662.666700 | 1536.000000 | 2642.667000 | 3574.333000 |
| 2       | 904.333300 | 2202.667000 | 2699.333000 | 3859.333000 |
| 3       | 931.000000 | 1812.667000 | 2974.333000 | 3334.333000 |

Fig 5 L lower panel

|         | A | B        |
|---------|---|----------|
| - mg132 |   | +mg132   |
|         | Y | Y        |
| 1       | 1 | 1.707241 |
| 2       | 1 | 1.773174 |
| 3       | 1 | 1.501426 |
