# Supplementary material for: MicroRNA exporter HuR clears the internalized pathogens by promoting pro‐inflammatory response in infected macrophages
Source: PubMed Central journal article supplement (PMC7059013; doi:10.15252/emmm.201911011), 2020-02-07
Supplement: EMMM-12-e11011-s008.pdf [file EMMM-12-e11011-s008.pdf]

Fig 6B

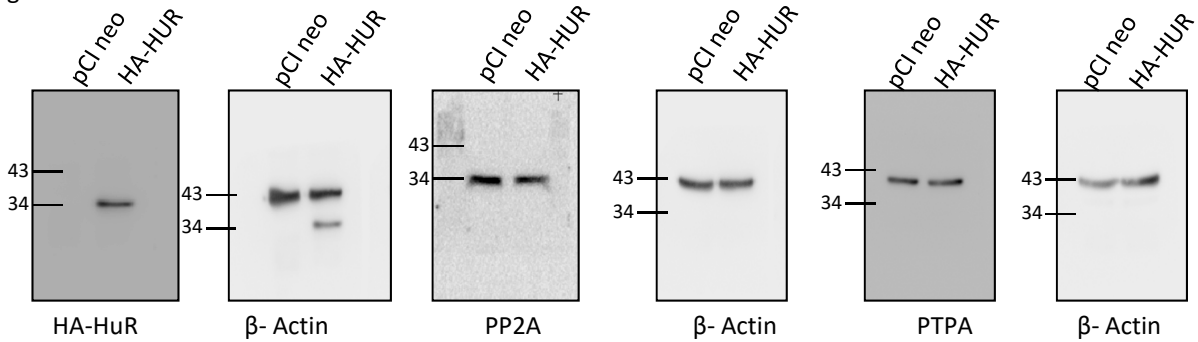

Figure 6C

|                              | A          | B          | C          | D          | E          | F          |
|------------------------------|------------|------------|------------|------------|------------|------------|
| Data 43                      | Data Set-A | Data Set-B | Data Set-C | Data Set-D | Data Set-E | Data Set-F |
| dox_cellular                 | Y          | Y          | Y          | Y          | Y          | Y          |
| dox_IP                       |            |            |            |            |            |            |
| WT_YF_OA_LD                  |            |            |            |            |            |            |
| <b>pCI hahuR_PP2A levels</b> |            |            |            |            |            |            |
| 1                            | 1          | 0.419748   | 1          | 0.432554   | 1          | 0.590380   |
| Data 49                      |            |            |            |            |            |            |
| Data 50                      |            |            |            |            |            |            |
| Data 51                      |            |            |            |            |            |            |

Figure 6D

|                               | X             | A              | B        | C          | D         |       |
|-------------------------------|---------------|----------------|----------|------------|-----------|-------|
| IL1B_+/-LPS_HAHUR             | Timepoint LPS | miRNA activity | IL-6     | PP2A level | HuR Level |       |
| HAHUR_BHU_%infected           | X             | Y              | Y        | Y          | Y         |       |
| siHUR_6hr LPS                 |               |                |          |            |           |       |
| 4G10 level in fraction Ld inf |               |                |          |            |           |       |
| LPS recycling +- OA           |               |                |          |            |           |       |
| Data 72                       |               |                |          |            |           |       |
| <b>LPS mathematical</b>       |               |                |          |            |           |       |
| Data 74                       |               |                |          |            |           |       |
| Data 75                       |               |                |          |            |           |       |
| ld mathematical               |               |                |          |            |           |       |
| sicon sipp2a_ld               |               |                |          |            |           |       |
| pp2a c ld lm infect           |               |                |          |            |           |       |
| 1                             | Title         | 0              | 1.000000 | 1.000000   | 0.714855  | 0.123 |
| 2                             | Title         | 3              | 0.337306 | 51.482150  | 0.956421  | 0.456 |
| 3                             | Title         | 6              | 0.363399 | 15.963080  | 0.985034  | 0.355 |
| 4                             | Title         | 9              | 0.650000 | 11.688360  | 1.010815  | 0.899 |
| 5                             | Title         | 12             | 0.934876 | 6.082512   | 0.996961  | 0.910 |
| 6                             | Title         | 24             | 1.062099 | 6.082512   | 1.000000  | 1.000 |
