# Supplementary material for: MicroRNA exporter HuR clears the internalized pathogens by promoting pro‐inflammatory response in infected macrophages
Source: PubMed Central journal article supplement (PMC7059013; doi:10.15252/emmm.201911011), 2020-02-07
Supplement: EMMM-12-e11011-s009.pdf [file EMMM-12-e11011-s009.pdf]

Fig 7D

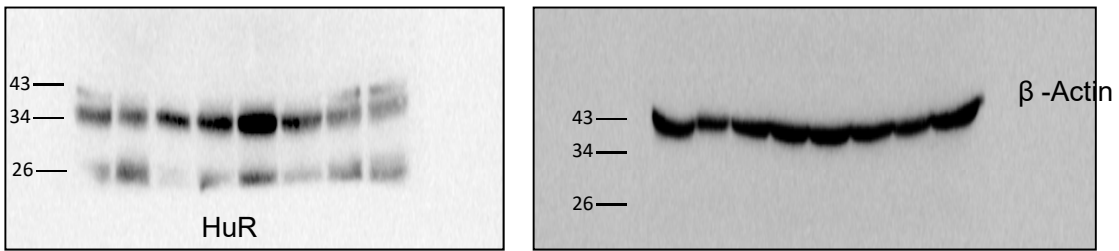

Fig 7E

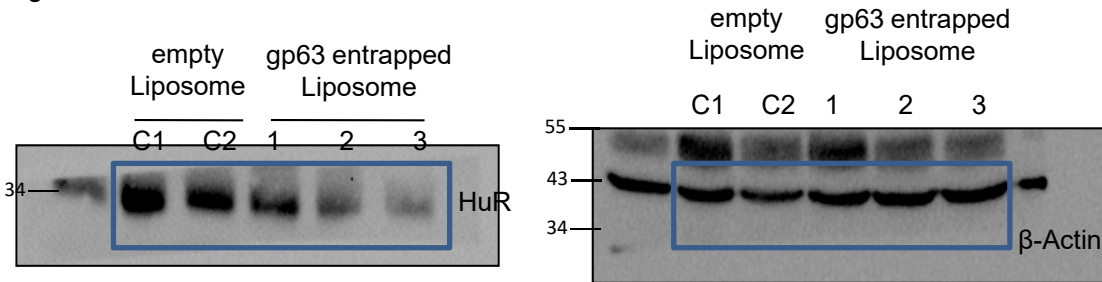

Fig 7F

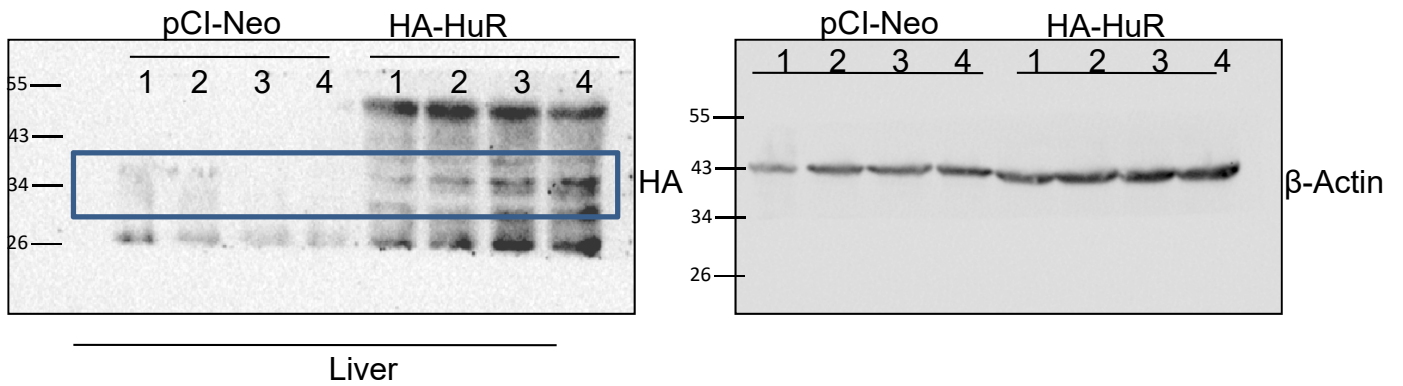

Fig 7J

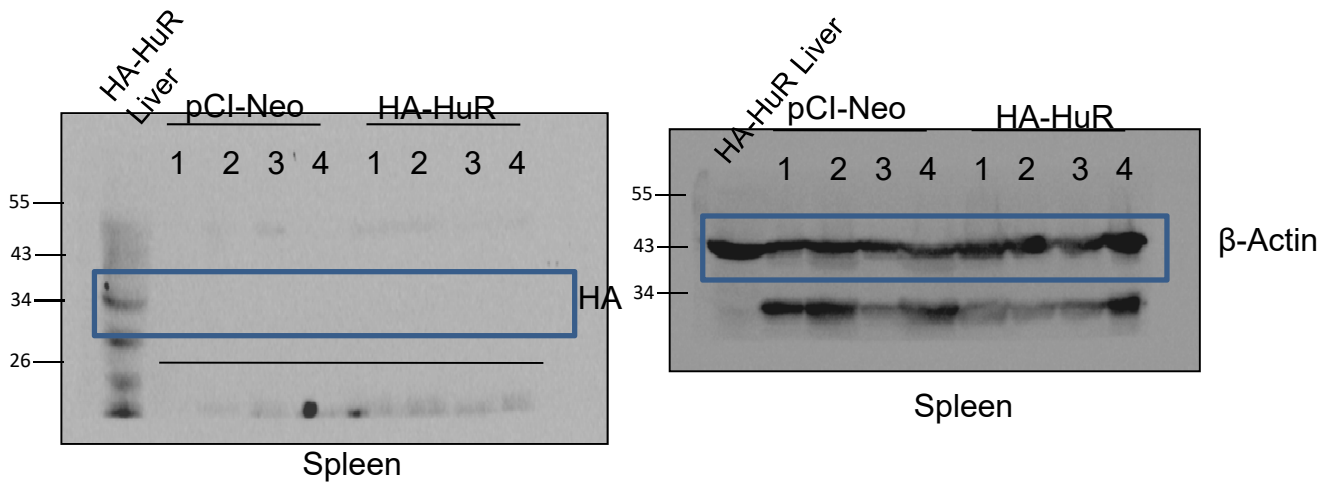

|    | A          | B          |
|----|------------|------------|
|    | Data Set-A | Data Set-B |
|    | Y          | Y          |
| 1  | 3          | 1          |
| 2  | 6          | 2          |
| 3  | 4          | 1          |
| 4  | 5          | 0          |
| 5  | 2          | 2          |
| 6  | 5          | 1          |
| 7  | 6          | 1          |
| 8  | 4          | 0          |
| 9  | 4          | 2          |
| 10 | 3          | 1          |
| 11 | 5          | 1          |
| 12 | 7          | 3          |
| 13 | 6          | 2          |
| 14 | 4          | 1          |
| 15 | 6          | 2          |
| 16 | 6          | 2          |
| 17 | 7          | 1          |
| 18 | 3          | 1          |
| 19 | 5          | 2          |
| 20 | 4          | 2          |
| 21 | 4          | 3          |

|   | A       | B        | C       | D        | E       | F        |
|---|---------|----------|---------|----------|---------|----------|
|   | PCI_Neo | HA_HuR   | PCI_Neo | HA_HuR   | PCI_Neo | HA_HuR   |
|   | Y       | Y        | Y       | Y        | Y       | Y        |
| 1 | 1       | 5.122398 | 1       | 4.853125 | 1       | 0.420236 |
| 2 | 1       | 7.388588 | 1       | 3.316952 | 1       | 0.422358 |
| 3 | 1       | 7.639124 | 1       | 3.878653 | 1       | 0.503094 |

|   | 0days LD | 10days LD | 35days LD |
|---|----------|-----------|-----------|
|   | Y        | Y         | Y         |
| 1 | 1.000000 | 0.694784  | 0.563615  |
| 2 | 1.000000 | 0.401811  | 0.503704  |
| 3 | 1.000000 | 0.373968  | 0.484763  |
| 4 | 1.000000 | 0.609549  | 0.501120  |
| 5 | 0.839059 | 0.591895  | 0.454786  |

Fig 7G

| Family                         |          | A        | B         |
|--------------------------------|----------|----------|-----------|
| Data Tables                    |          | PCI_Neo  | HA_HuR    |
| TNFa                           |          | Y        | Y         |
| IL-10                          |          |          |           |
| LD count                       |          |          |           |
| <b>Ld count dot plot liver</b> | <b>1</b> | 8.446000 | 12.680500 |
| TNFa dot plot                  | <b>2</b> | 9.510000 | 11.197000 |
| IL10 dot plot                  | <b>3</b> | 9.579333 | 10.885000 |
| HuR band quantify              | <b>4</b> | 9.228000 | 12.550670 |
| Data 9                         | <b>5</b> | 9.615000 | 10.276000 |
| Data 10                        |          |          |           |

Fig 7H

| Family                  |          | Table format: | A         | B         |
|-------------------------|----------|---------------|-----------|-----------|
| Data Tables             |          | Column        | PCI_Neo   | HA_HuR    |
| TNFa                    |          |               | Y         | Y         |
| IL-10                   |          |               |           |           |
| LD count                |          |               |           |           |
| Ld count dot plot liver |          |               |           |           |
| <b>TNFa dot plot</b>    | <b>1</b> |               | 15.229000 | 14.266000 |
| IL10 dot plot           | <b>2</b> |               | 15.751000 | 12.916670 |
| HuR band quantify       | <b>3</b> |               | 15.624170 | 14.749000 |
| Data 9                  | <b>4</b> |               | 15.212330 | 14.793000 |
| Data 10                 | <b>5</b> |               | 15.474330 | 14.382670 |
| Data 11                 | <b>6</b> |               | 15.006670 |           |

Fig 7I

| Family                  |          | Table format: | A         | B         |
|-------------------------|----------|---------------|-----------|-----------|
| Data Tables             |          | Column        | PCI_Neo   | HA_HuR    |
| TNFa                    |          |               | Y         | Y         |
| IL-10                   |          |               |           |           |
| LD count                |          |               |           |           |
| Ld count dot plot liver |          |               |           |           |
| TNFa dot plot           |          |               |           |           |
| <b>IL10 dot plot</b>    | <b>1</b> |               | 16.092000 | 16.766000 |
| HuR band quantify       | <b>2</b> |               | 16.416330 | 17.852000 |
|                         | <b>3</b> |               | 16.274330 | 19.054000 |
|                         | <b>4</b> |               | 16.515170 | 17.411000 |

Fig 7K

| Family                       |          | Table format: | A        | B        |
|------------------------------|----------|---------------|----------|----------|
| Data Tables                  |          | Column        | pCI-neo  | HA-HuR   |
| Data 12                      |          |               | Y        | Y        |
| Ld count in spleen           |          |               |          |          |
| Data 14                      |          |               |          |          |
| Data 15                      |          |               |          |          |
| HAHUR_BHU                    |          |               |          |          |
| <b>spleen tnfa pci hahur</b> | <b>1</b> |               | 1.000000 | 1.536875 |
| spleen il-10 pci hur         | <b>2</b> |               | 1.000000 | 0.801996 |
| spleen ld count pci hur      | <b>3</b> |               | 1.000000 | 0.756983 |
| tnfa hahur ag83              | <b>4</b> |               | 1.000000 | 1.180993 |
