# Supplementary material for: MicroRNA exporter HuR clears the internalized pathogens by promoting pro‐inflammatory response in infected macrophages
Source: PubMed Central journal article supplement (PMC7059013; doi:10.15252/emmm.201911011), 2020-02-07
Supplement: EMMM-12-e11011-s010.pdf [file EMMM-12-e11011-s010.pdf]

Figure 8 Goswami et al. Source Data File

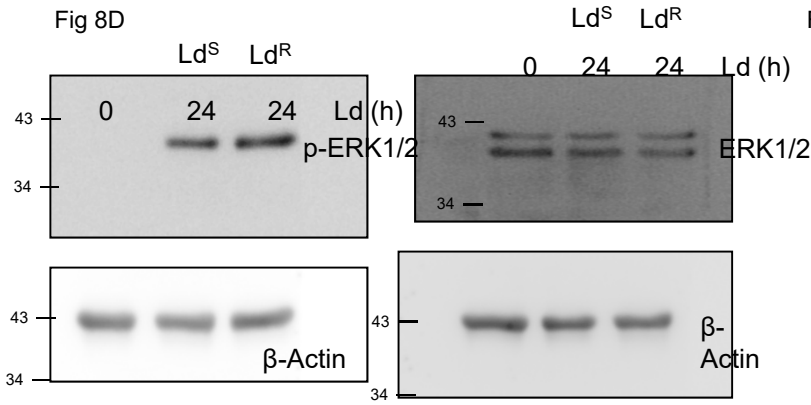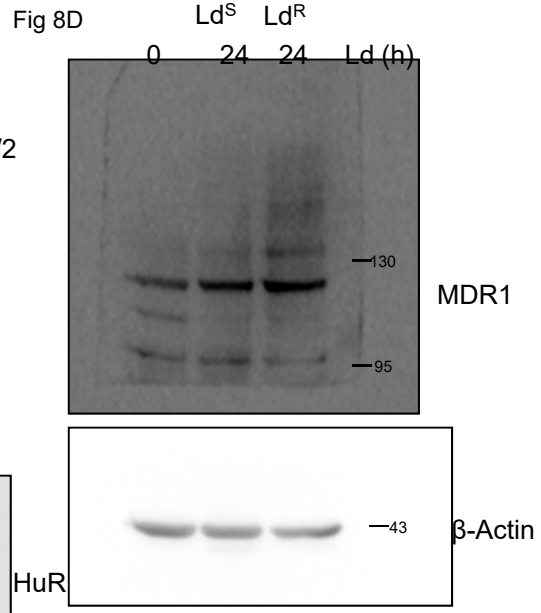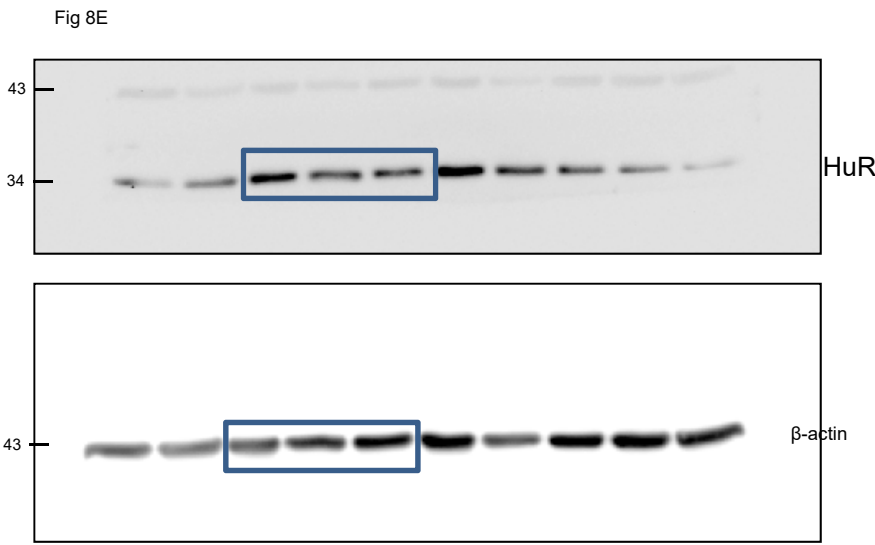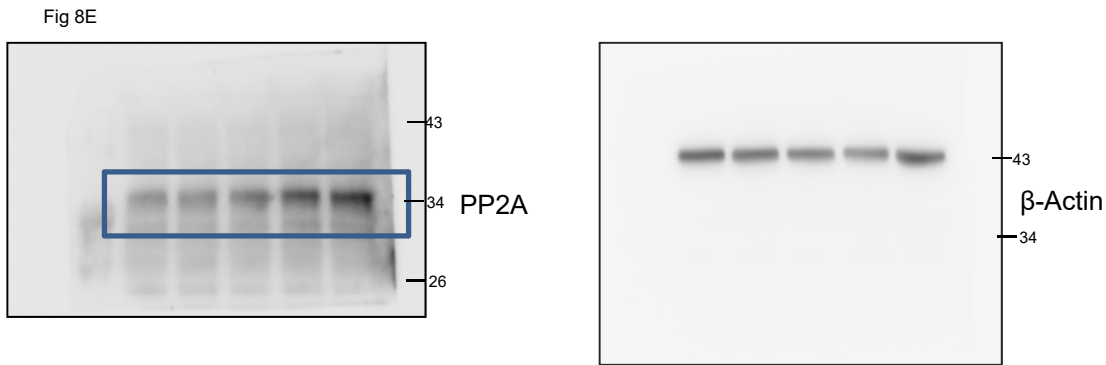

FIG 8 A

|   | A       | B        | C        |
|---|---------|----------|----------|
|   | control | Ag83     | BHU569   |
|   | Y       | Y        | Y        |
| 1 | 1       | 1.918528 | 4.458835 |
| 2 | 1       | 1.844632 | 2.918041 |
| 3 | 1       | 1.863912 | 3.138336 |

FIG 8 B

|   | A        | B        | C        |
|---|----------|----------|----------|
|   | control  | Ag83     | BHU569   |
|   | Y        | Y        | Y        |
| 1 | 1.000000 | 0.632878 | 0.204476 |
| 2 | 1.000000 | 0.392292 | 0.250578 |
| 3 | 1.000000 | 0.605696 | 0.540862 |

FIG 8 C

|   | A        | B        | C        |
|---|----------|----------|----------|
|   | control  | Ag83     | BHU569   |
|   | Y        | Y        | Y        |
| 1 | 1.000000 | 1.604060 | 2.544983 |
| 2 | 1.000000 | 1.532725 | 2.359476 |
| 3 | 1.000000 | 1.753871 | 2.952169 |

FIG 8 F left panel

|   | A             | B             | C                | D                |
|---|---------------|---------------|------------------|------------------|
|   | neo-BHU569-OA | neo-BHU569+OA | HA-Hur-BHU569-OA | HA-Hur-BHU569+OA |
|   | Y             | Y             | Y                | Y                |
| 1 | 1             | 8.046344      | 1                | 18.231150        |
| 2 | 1             | 6.688426      | 1                | 28.773460        |
| 3 | 1             | 7.826316      | 1                | 39.487750        |
| 4 | 1             | 6.758329      | 1                | 38.230880        |

FIG 8 F right panel

|   | A             | B             | C                | D                |
|---|---------------|---------------|------------------|------------------|
|   | neo-BHU569-OA | neo-BHU569+OA | HA-Hur-BHU569-OA | HA-Hur-BHU569+OA |
|   | Y             | Y             | Y                | Y                |
| 1 | 1             | 2.614738      | 1                | 4.993322         |
| 2 | 1             | 1.140764      | 1                | 7.772255         |
| 3 | 1             | 0.179244      | 1                | 4.856780         |
| 4 |               |               | 1                | 3.482202         |

FIG 8 H left panel

|   | A        | B        | C        | D        |
|---|----------|----------|----------|----------|
|   | -OA      | +OA      | -OA      | +OA      |
|   | Y        | Y        | Y        | Y        |
| 1 | 1.000000 | 0.814696 | 1.565908 | 2.221879 |
| 2 | 1.000000 | 0.792793 | 1.003482 | 2.569847 |
| 3 | 1.000000 | 0.627201 | 0.744322 | 2.495456 |
| 4 | 1.000000 | 1.646041 | 0.769504 | 7.387059 |
| 5 | 1.000000 | 1.252580 | 0.968540 | 3.254870 |
| 6 | 1.000000 | 0.879540 | 1.101250 | 2.986540 |

FIG 8 H Right panel

|   | A        | B        | C        | D        |
|---|----------|----------|----------|----------|
|   | -OA      | +OA      | -OA      | +OA      |
|   | Y        | Y        | Y        | Y        |
| 1 | 1.000000 | 0.611461 | 0.429580 | 2.959515 |
| 2 | 1.000000 | 1.048747 | 0.461052 | 5.939466 |
| 3 | 1.000000 | 0.990140 | 1.523127 | 2.127319 |
| 4 | 1.000000 | 0.907409 | 1.633717 | 2.960466 |
| 5 | 1.000000 | 1.015487 | 1.025689 | 3.125680 |
| 6 | 1.000000 | 0.895410 | 1.356890 | 4.025458 |

FIG 8 I

|   | A        | B        | C        | D        |
|---|----------|----------|----------|----------|
|   | -OA      | +OA      | -OA      | +OA      |
|   | Y        | Y        | Y        | Y        |
| 1 | 1.000000 | 1.005793 | 0.859757 | 0.587367 |
| 2 | 0.966160 | 1.246889 | 0.863938 | 0.509917 |
| 3 | 0.798114 | 0.931525 | 0.959042 | 0.487678 |
| 4 | 0.986461 | 0.978968 | 0.841479 | 0.149927 |
| 5 | 0.926374 | 1.061178 | 0.962150 | 0.101321 |
| 6 | 1.000000 | 1.014428 | 1.030969 | 0.108970 |
